# Supplementary material
Source: MDPI journal article supplement (https://www.mdpi.com/2077-1312/10/6/746)

**Figure S1** Long-term spectral averages for each site by year. Prominent sound sources are indicated for each site for the same year that was used to create PSD%PD plots. Annual LTSA plots are followed by shorter LTSA snippets to illustrate fish choruses (black arrow, Chorus I; red arrow, Chorus II; blue ellipses, Chorus IV; red circles, Chorus V; purple ellipses, Chorus VI), squid choruses (black ellipses), the unknown chorus (green box), and vessel presence (grey boxes). Black brackets on annual LTSAs indicate time blocks covered by shorter snippets.

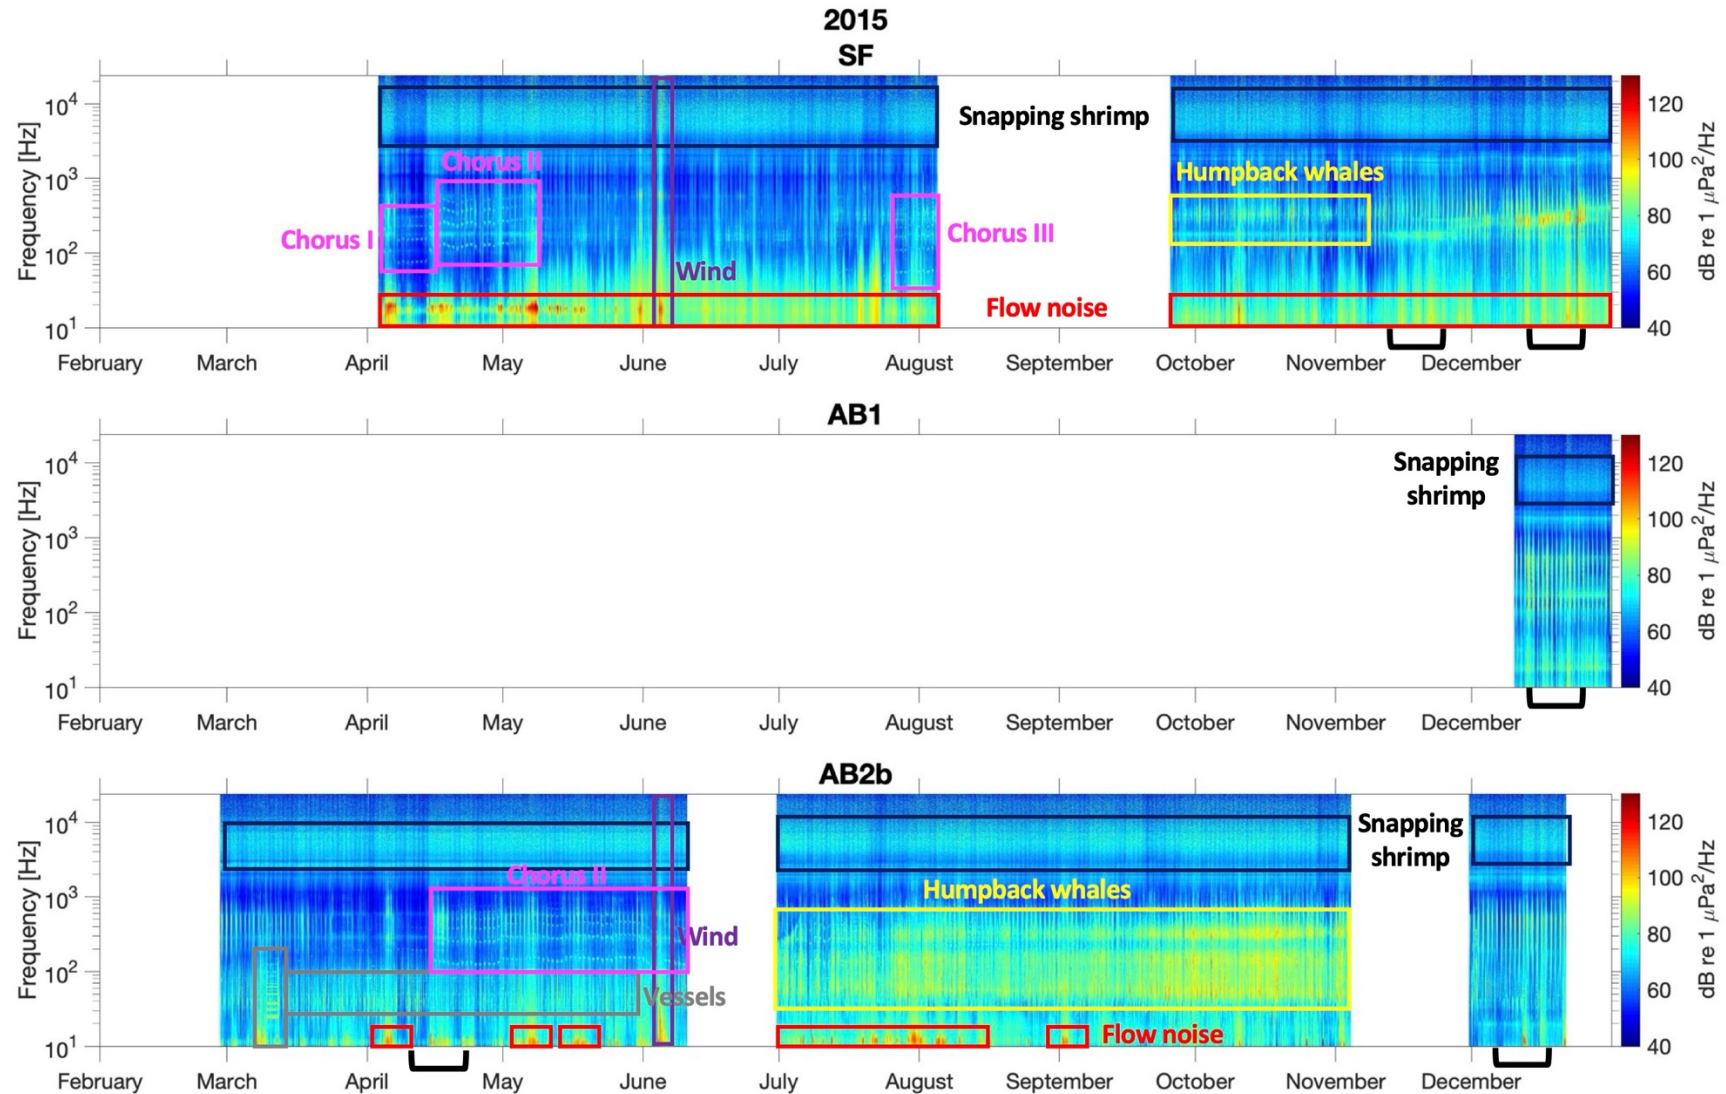

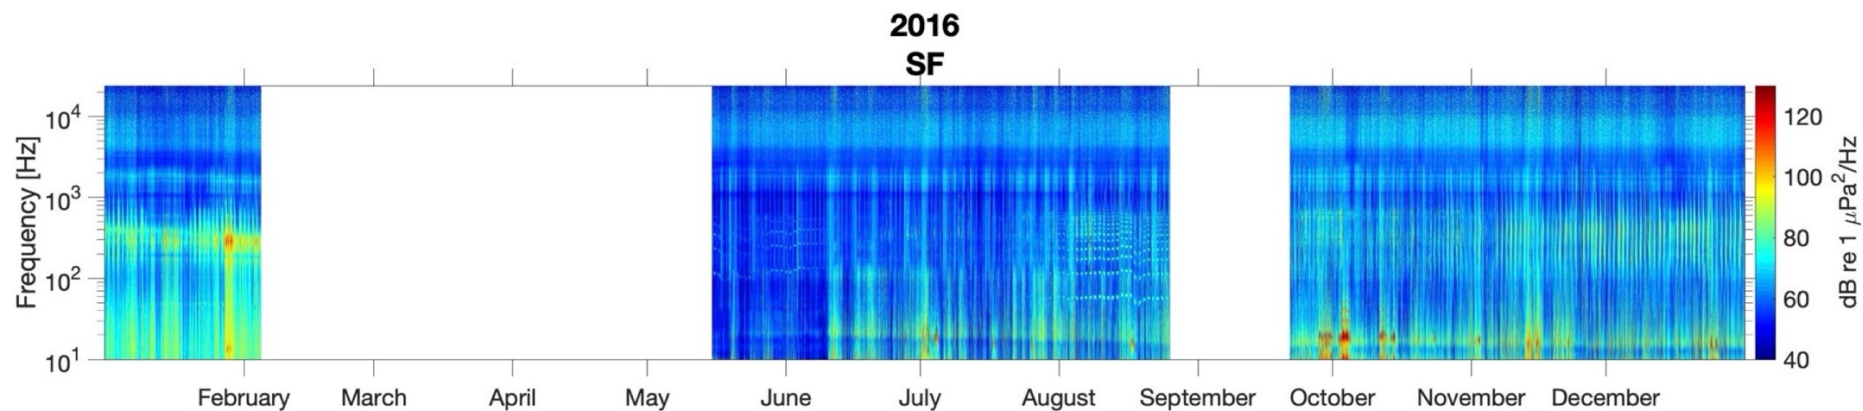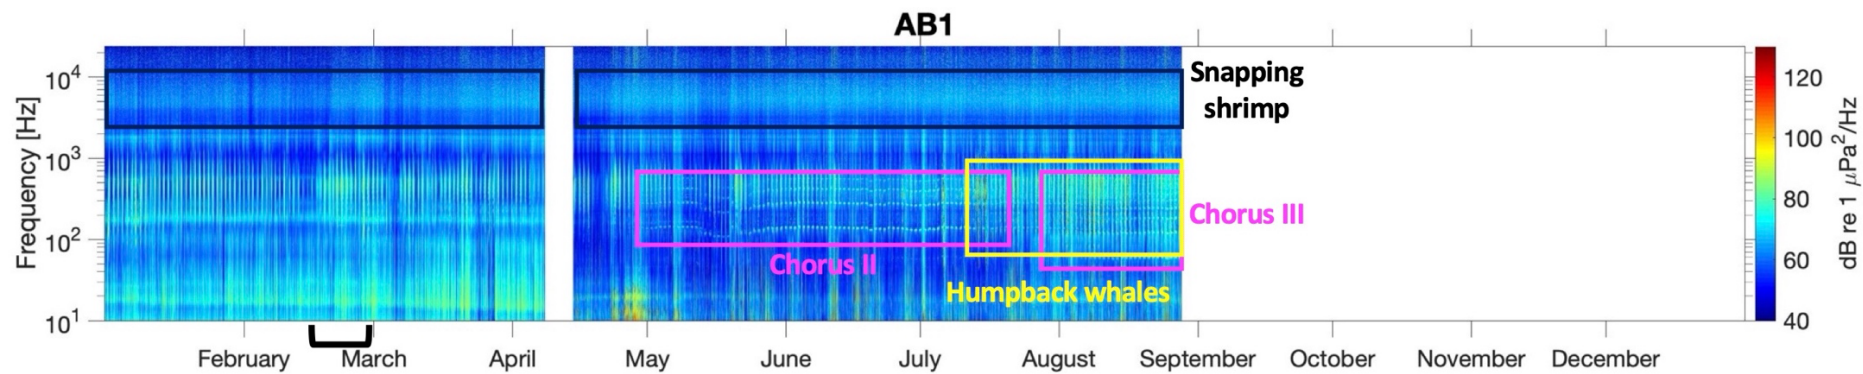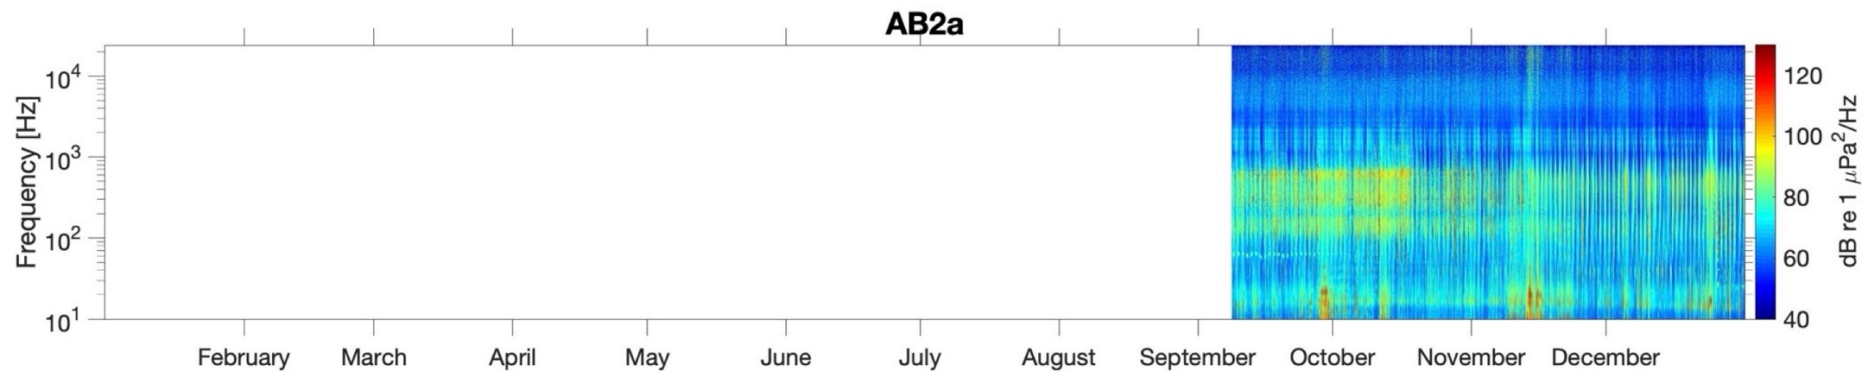



2017/18

SF

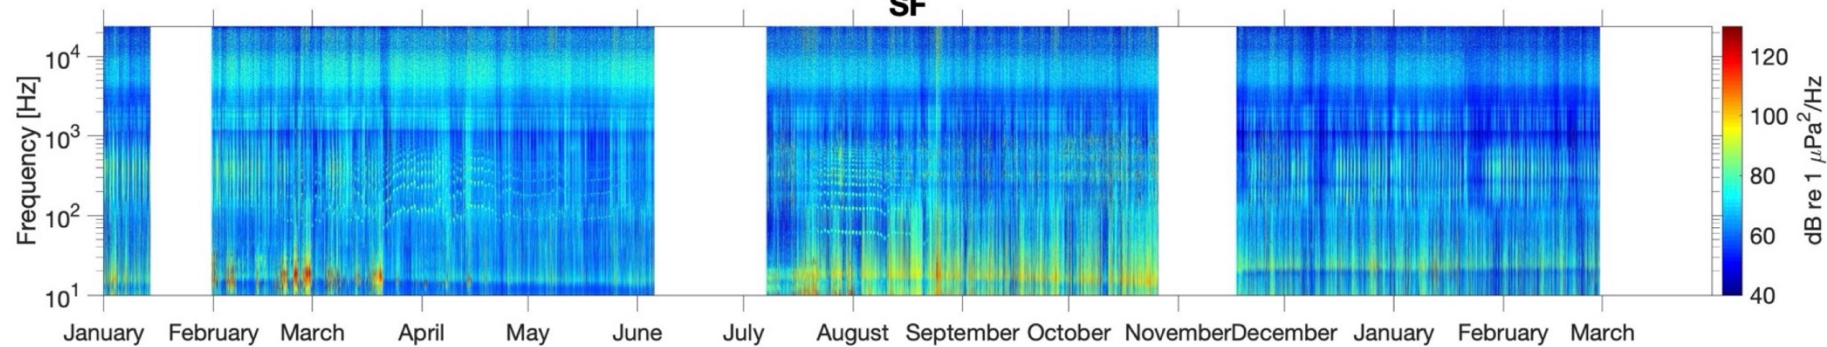

AB1

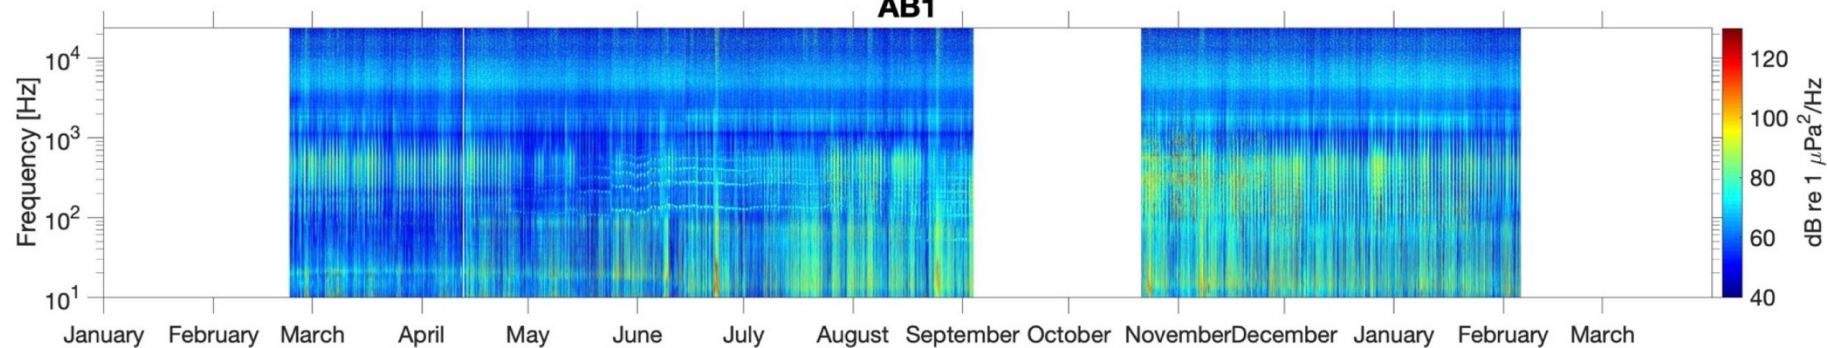

AB2a

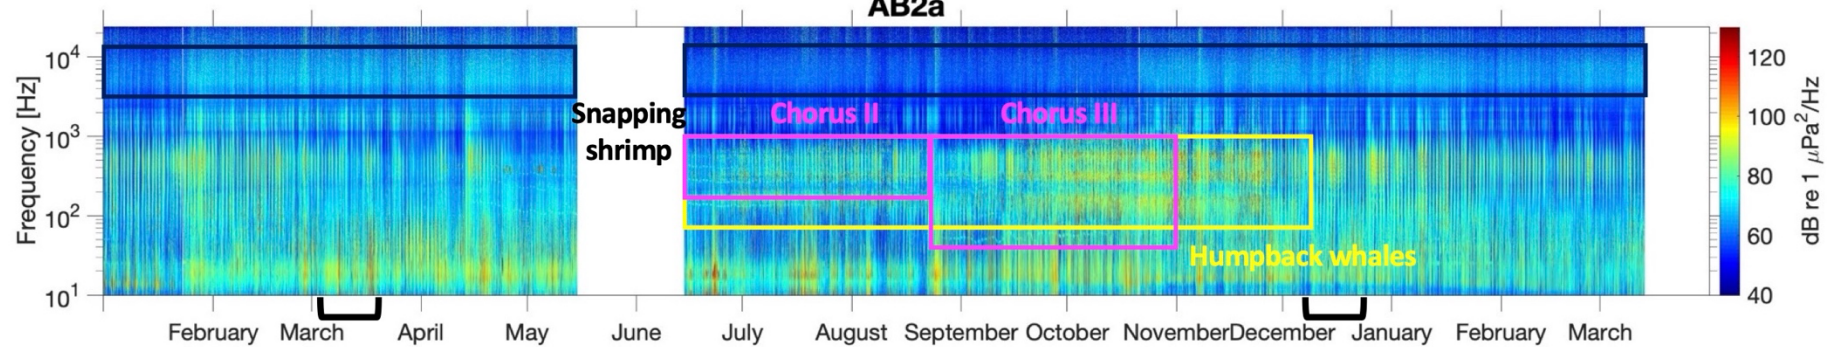



### SF 2015:

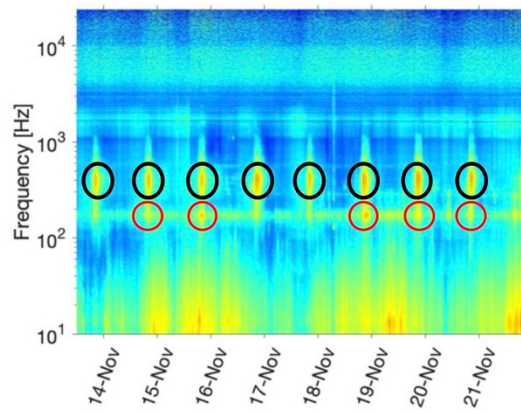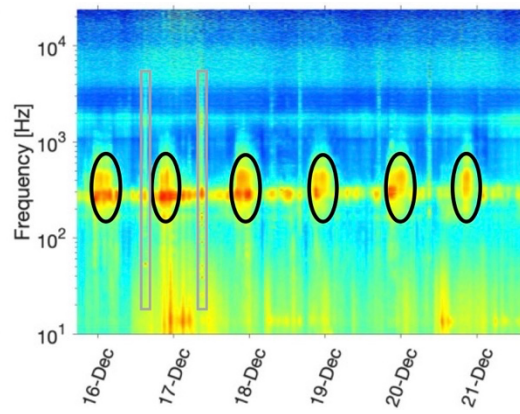

### AB1 2015-2016:

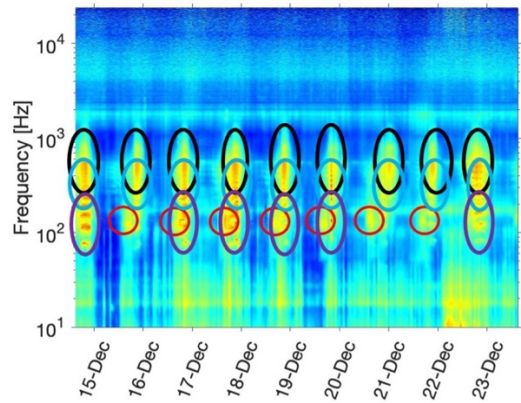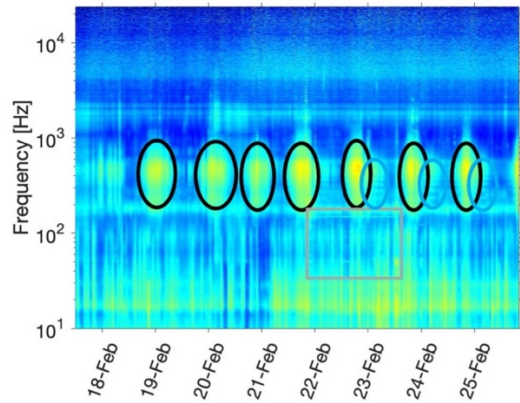

### AB2a 2017:

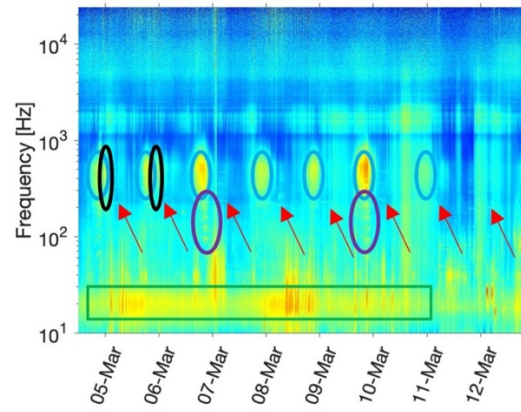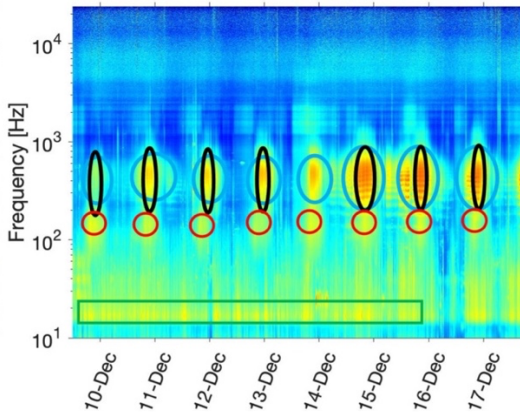

### AB2b 2015:

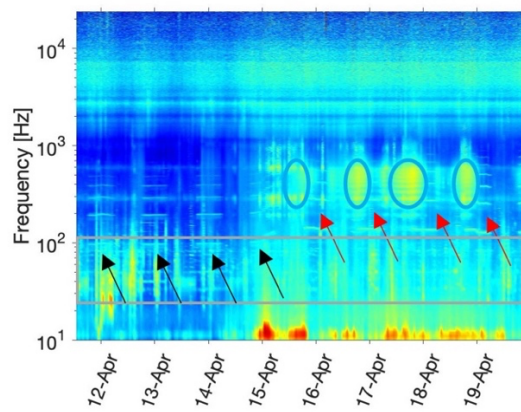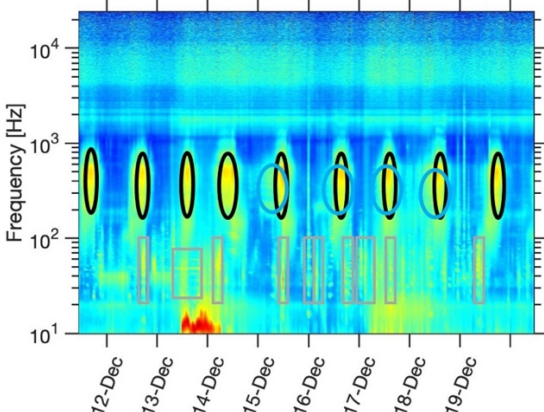



**Table S1** List of the 25 acoustic zones with their bathymetric, hydroacoustic, and geoacoustic properties. Unconsolidated sediment abbreviations stand for: medium (M), coarse (C), medium to fine (MF), and fine (F). Compressional wave velocity ( $C_p$ ), shear wave velocity ( $C_s$ ), and density with depth in sand/silt and gravel were calculated following [1-3] and [4], respectively. Compressional and shear wave attenuation (i.e.,  $\alpha_p$  and  $\alpha_s$ ) for all sediments were derived from [4].

| Zone | Mean depth [m] | Sound Speed Profile (SSP) | Consolidated sediment | Unconsolidated sediment | Unconsolidated sediment thickness [m] | $C_p$ [m/s] |        | $C_s$ [m/s] |        | $\alpha_p$ [dB/ $\lambda$ ] | $\alpha_s$ [dB/ $\lambda$ ] | Density [kg/m <sup>3</sup> ] |        |
|------|----------------|---------------------------|-----------------------|-------------------------|---------------------------------------|-------------|--------|-------------|--------|-----------------------------|-----------------------------|------------------------------|--------|
|      |                |                           |                       |                         |                                       | Top         | Bottom | Top         | Bottom |                             |                             | Top                          | Bottom |
| 1    | 113            | Shelf offshore            | Sandstone             | M pebbles               | 0.7                                   | 1825        | 1825   | 48          | 173    | 0.6                         | 1.5                         | 2106                         | 2106   |
| 2    | 119            | Shelf offshore            | Quartzite             | M pebbles               | 0.5                                   | 1825        | 1825   | 48          | 156    | 0.6                         | 1.5                         | 2106                         | 2106   |
| 3    | 121            | Shelf offshore            | Sandstone             | C silt                  | 1.1                                   | 1626        | 1703   | 116         | 121    | 0.9                         | 2.2                         | 1656                         | 1743   |
| 4    | 614            | Slope                     | Sandstone             | F Pebbles               | 0.5                                   | 1815        | 1815   | 47          | 152    | 0.6                         | 1.5                         | 2103                         | 2103   |
| 5    | 114            | Shelf offshore            | Sandstone             | MF silt                 | 0.8                                   | 1526        | 1526   | 116         | 119    | 0.5                         | 1.2                         | 1542                         | 1542   |
| 6    | 108            | Shelf offshore            | Quartzite             | MF silt                 | 0.5                                   | 1526        | 1526   | 116         | 118    | 0.4                         | 1.2                         | 1542                         | 1539   |
| 7    | 42             | Shelf offshore            | Quartzite             | MF sand                 | 9.1                                   | 1768        | 1912   | 25          | 208    | 0.6                         | 1.7                         | 1817                         | 1980   |
| 8    | 17             | Shelf bay                 | Quartzite             | MF sand                 | 7.5                                   | 1768        | 1906   | 25          | 196    | 0.6                         | 1.7                         | 1817                         | 1974   |
| 9    | 61             | Shelf bay                 | Sandstone             | MF sand                 | 7.5                                   | 1768        | 1906   | 25          | 196    | 0.6                         | 1.7                         | 1817                         | 1974   |
| 10   | 45             | Shelf bay                 | Sandstone             | MF sand                 | 13.0                                  | 1768        | 1922   | 25          | 232    | 0.6                         | 1.7                         | 1817                         | 1991   |
| 11   | 53             | Shelf bay                 | Sandstone             | MF sand                 | 6.5                                   | 1768        | 1902   | 25          | 187    | 0.6                         | 1.7                         | 1817                         | 1969   |
| 12   | 45             | Shelf bay                 | Sandstone             | MF sand                 | 11.0                                  | 1768        | 1917   | 25          | 220    | 0.6                         | 1.7                         | 1817                         | 1986   |
| 13   | 59             | Shelf offshore            | Quartzite             | MF sand                 | 11.6                                  | 1768        | 1919   | 25          | 224    | 0.6                         | 1.7                         | 1817                         | 1988   |
| 14   | 42             | Shelf bay                 | Sandstone             | MF sand                 | 16.0                                  | 1768        | 1928   | 25          | 248    | 0.6                         | 1.7                         | 1817                         | 1998   |
| 15   | 70             | Shelf offshore            | Quartzite             | MF sand                 | 14.5                                  | 1768        | 1925   | 25          | 240    | 0.6                         | 1.7                         | 1817                         | 1995   |
| 16   | 104            | Shelf offshore            | Sandstone             | F sand                  | 6.8                                   | 1754        | 1888   | 25          | 190    | 0.7                         | 1.8                         | 1801                         | 1953   |
| 17   | 31             | Shelf bay                 | Sandstone             | MF sand                 | 0.5                                   | 1768        | 1830   | 25          | 84     | 0.6                         | 1.7                         | 1817                         | 1887   |
| 18   | 70             | Shelf offshore            | Quartzite             | F sand                  | 0.8                                   | 1754        | 1836   | 25          | 97     | 0.7                         | 1.8                         | 1801                         | 1894   |
| 19   | 1980           | Slope                     | Sandstone             | MF sand                 | 0.5                                   | 1768        | 1830   | 25          | 84     | 0.6                         | 1.6                         | 1817                         | 1904   |
| 20   | 1565           | Slope                     | Quartzite             | MF sand                 | 0.5                                   | 1768        | 1830   | 25          | 84     | 0.6                         | 1.6                         | 1817                         | 1904   |
| 21   | 4157           | Deep                      | Sandstone             | MF sand                 | 0.5                                   | 1768        | 1830   | 25          | 84     | 0.6                         | 1.6                         | 1817                         | 1913   |
| 22   | 115            | Shelf offshore            | Sandstone             | MF sand                 | 0.5                                   | 1768        | 1830   | 25          | 84     | 0.6                         | 1.6                         | 1817                         | 1904   |
| 23   | 82             | Shelf offshore            | Quartzite             | MF sand                 | 6.3                                   | 1768        | 1900   | 25          | 185    | 0.6                         | 1.6                         | 1817                         | 1995   |

|           |    |                |           |         |     |      |      |    |     |     |     |      |      |
|-----------|----|----------------|-----------|---------|-----|------|------|----|-----|-----|-----|------|------|
| <b>24</b> | 99 | Shelf offshore | Quartzite | M sand  | 9.1 | 1805 | 1952 | 25 | 208 | 0.6 | 1.5 | 1859 | 2025 |
| <b>25</b> | 25 | Shelf bay      | Quartzite | MF sand | 0.5 | 1768 | 1830 | 25 | 84  | 0.6 | 1.7 | 1817 | 1887 |

- [1] Hamilton, E.L. Geoacoustic modeling of the sea floor. J. Acoust. Soc. Am. 1980, 68, 1313–1340, doi:10.1121/1.385100.
- [2] Hamilton, E.L. Sound velocity-density relations in sea-floor sediments and rocks. J. Acoust. Soc. Am. 1978, 63, 366–377, doi:10.1121/1.381747.
- [3] Hamilton, E.L. Shear-wave velocity versus depth in marine sediments: A review. Geophysics 1976, 41, 985–996, doi:10.1190/1.1440676.
- [4] Jensen, F.B.; Kuperman, W.A.; Porter, M.B.; Schmidt, H. Computational Ocean Acoustics; Springer: New York, United States., 2011. doi: 10.1007/978-1-4419-8678-8.



**Figure S2** Example plots of clustered source-receiver transects for vessels of Class 5 in Zone 20. The thick black line indicates the centroid bathymetry along which sound propagation loss was modelled. Y-axes provide the water depth in meters below the sea surface and X-axes provide the range in kilometres.

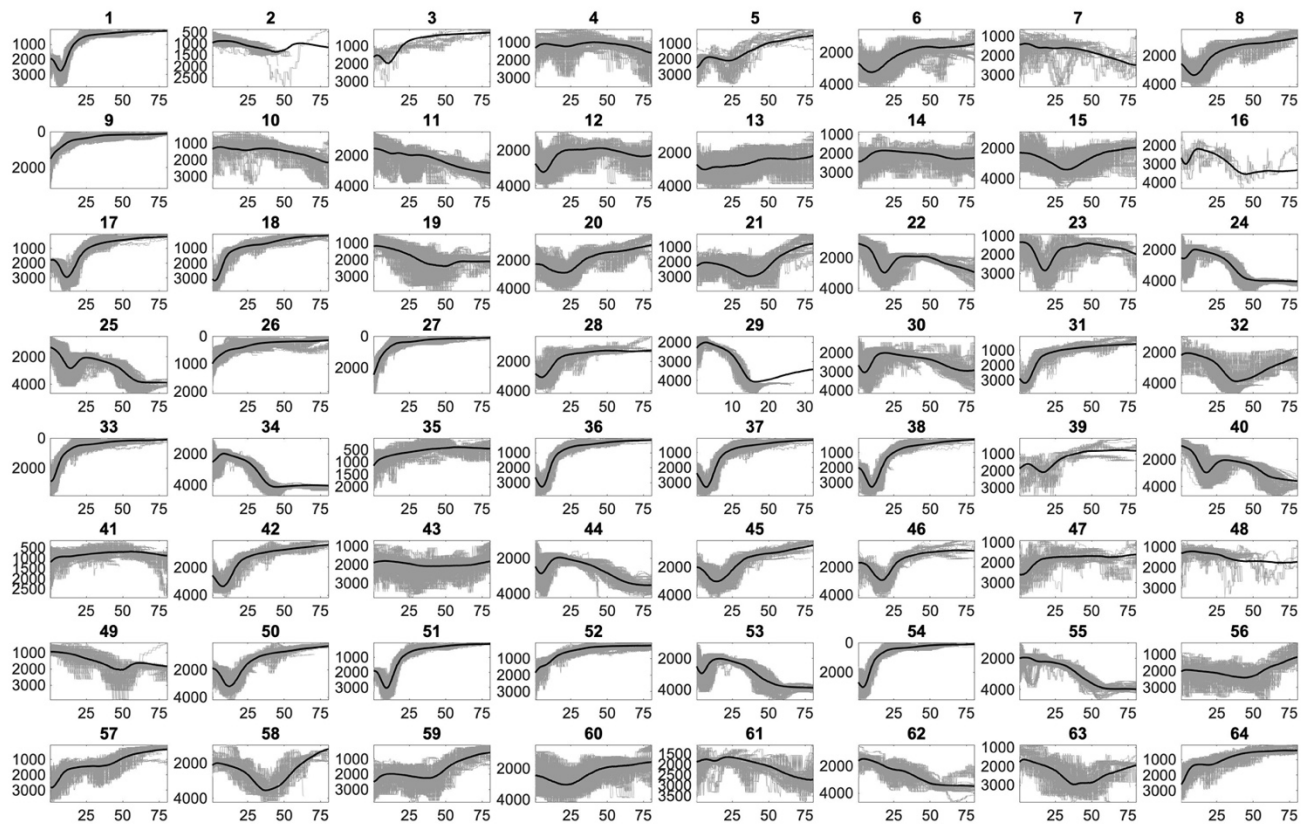

**Figure S3** Example plots of propagation loss (i.e., over range and depth for 125 Hz) along the 64 bathymetry cluster centroids obtained for vessels of Class 5 in Zone 20. Propagation loss for this vessel class was modelled with a source depth of 7 m. Y-axes provide the water depth in metres below the sea surface and X-axes provide the range in kilometres.

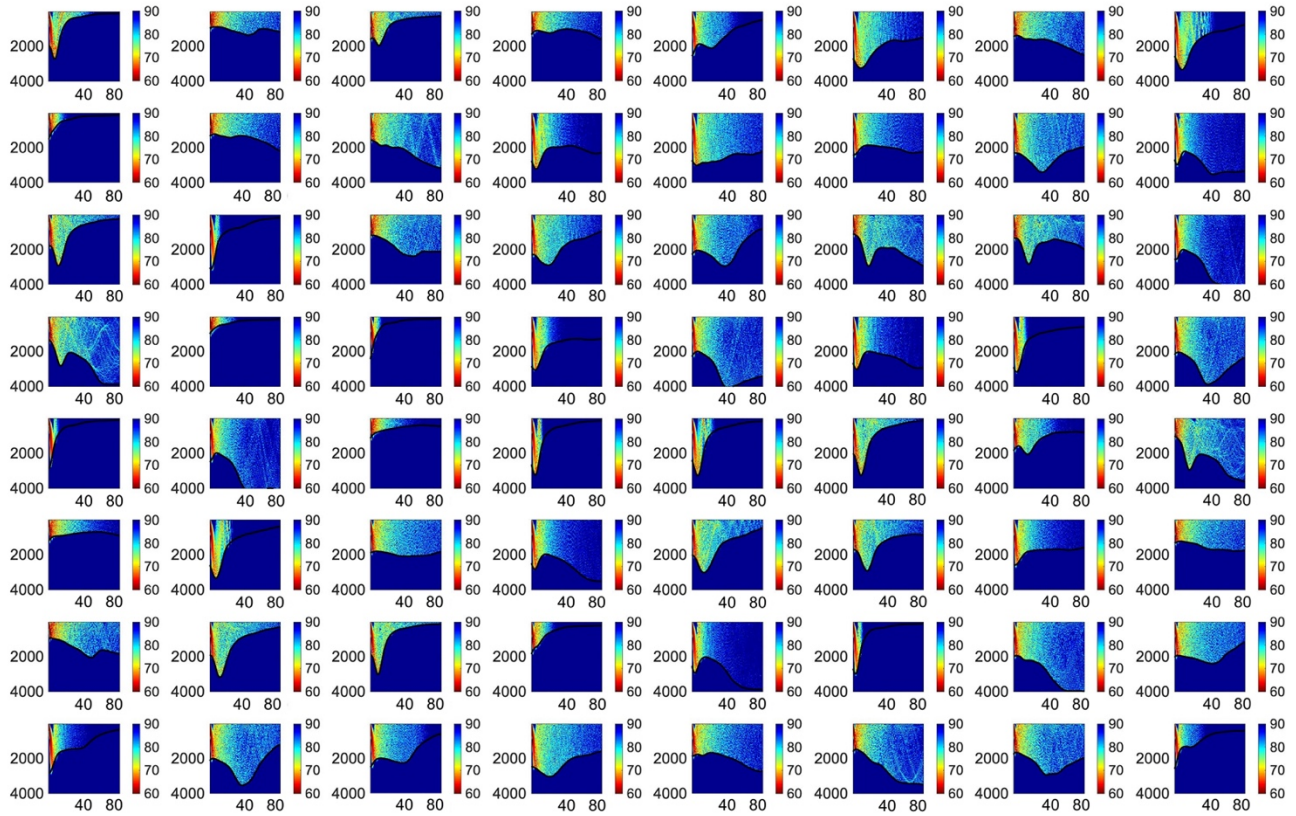



**Figure S4** Whittaker-Robinson periodograms for recorded broadband (30 Hz - 24 kHz) Sound Pressure Levels during deployments at site SF. “n” indicates the number of hourly samples used to calculate the full periodogram. However, for each site, a maximum of 1500 periods are shown (i.e., 3000 h). Black squares indicate significant (i.e.,  $p < 0.05$ ) periods and harmonics. Deployments where the recording duty cycle increased to 5 min every 20 min have inserts with periodograms based on this higher sampling duty. Insert periodograms cover 504 periods (i.e., 7 days).

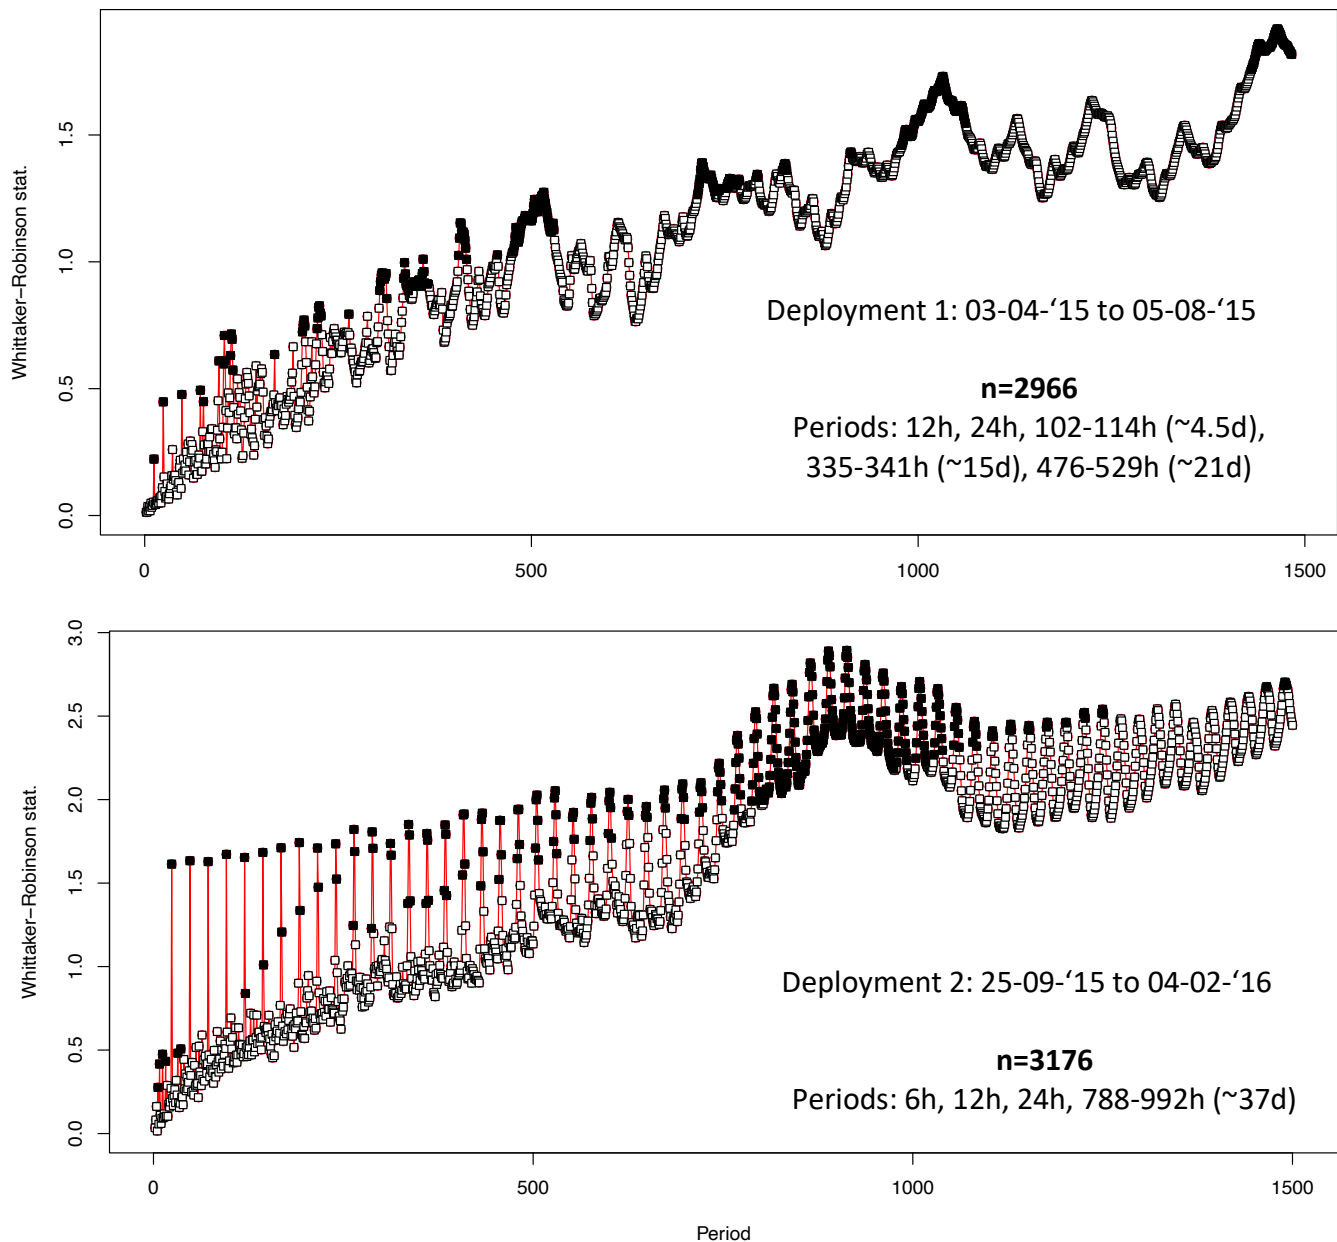

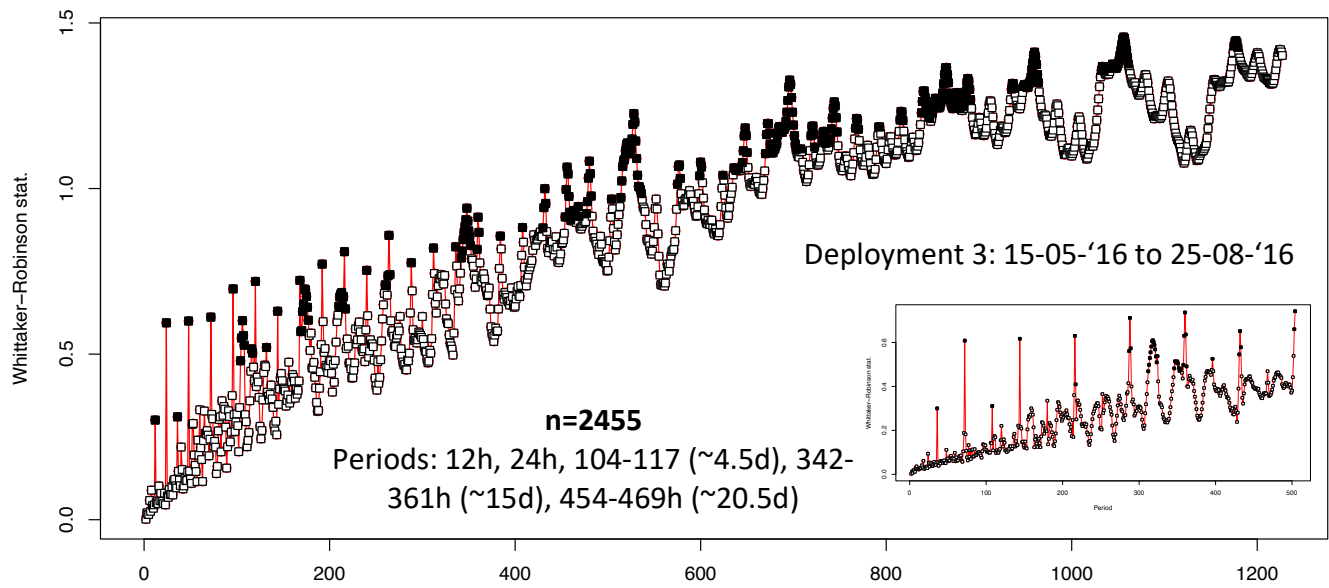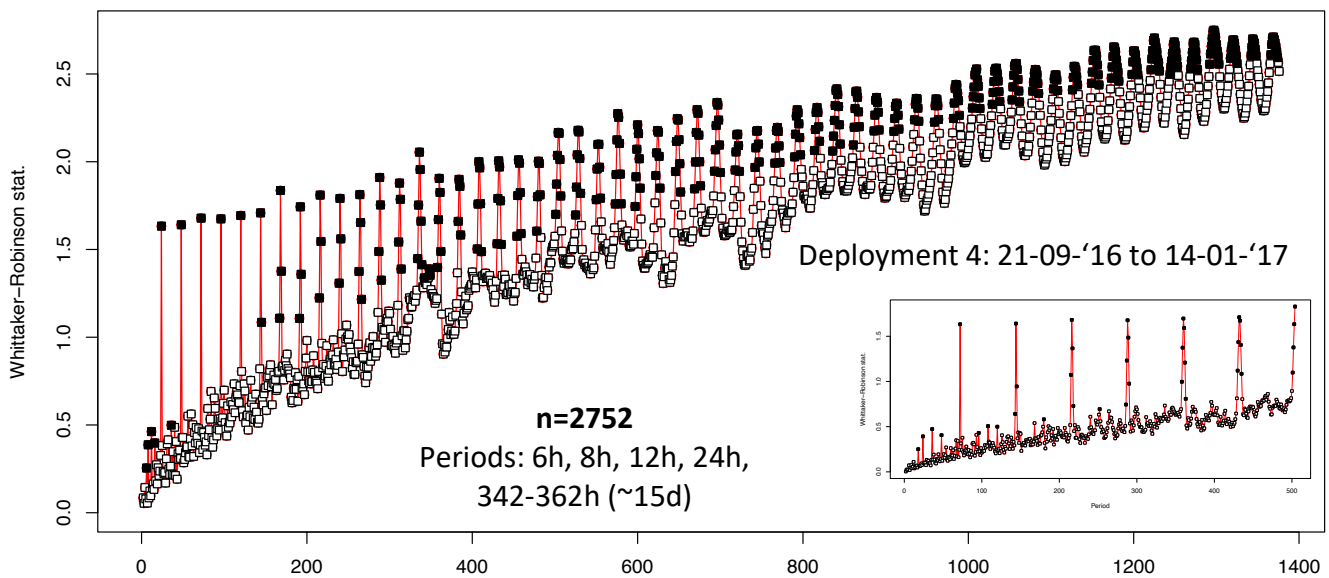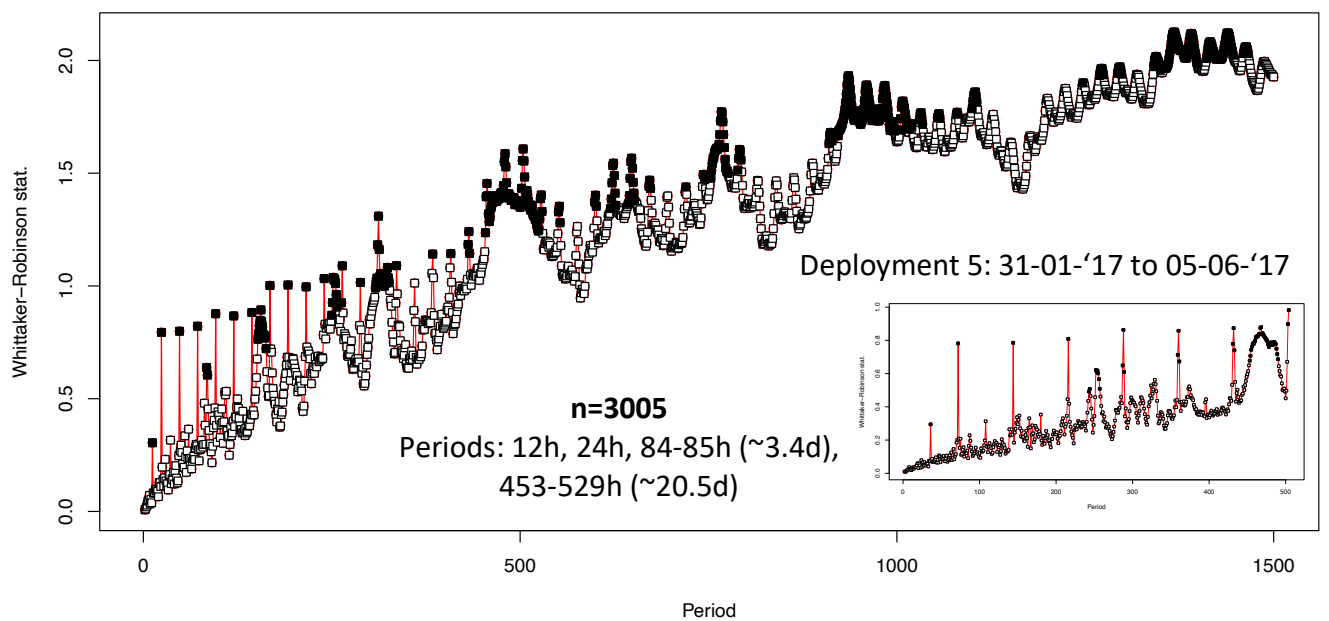



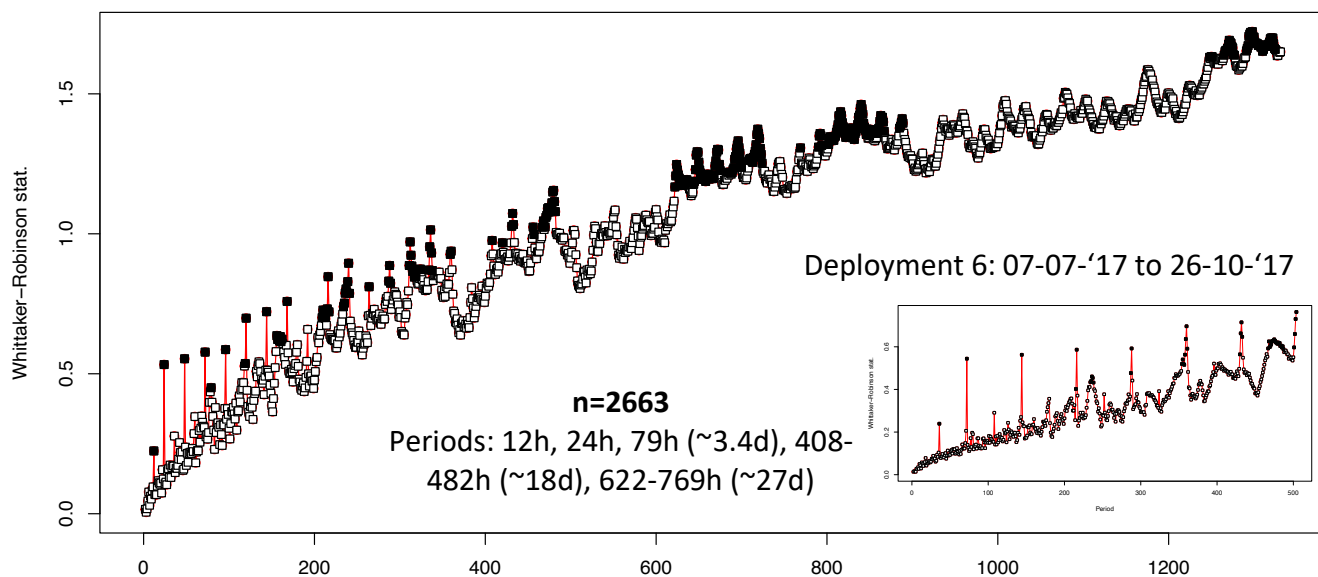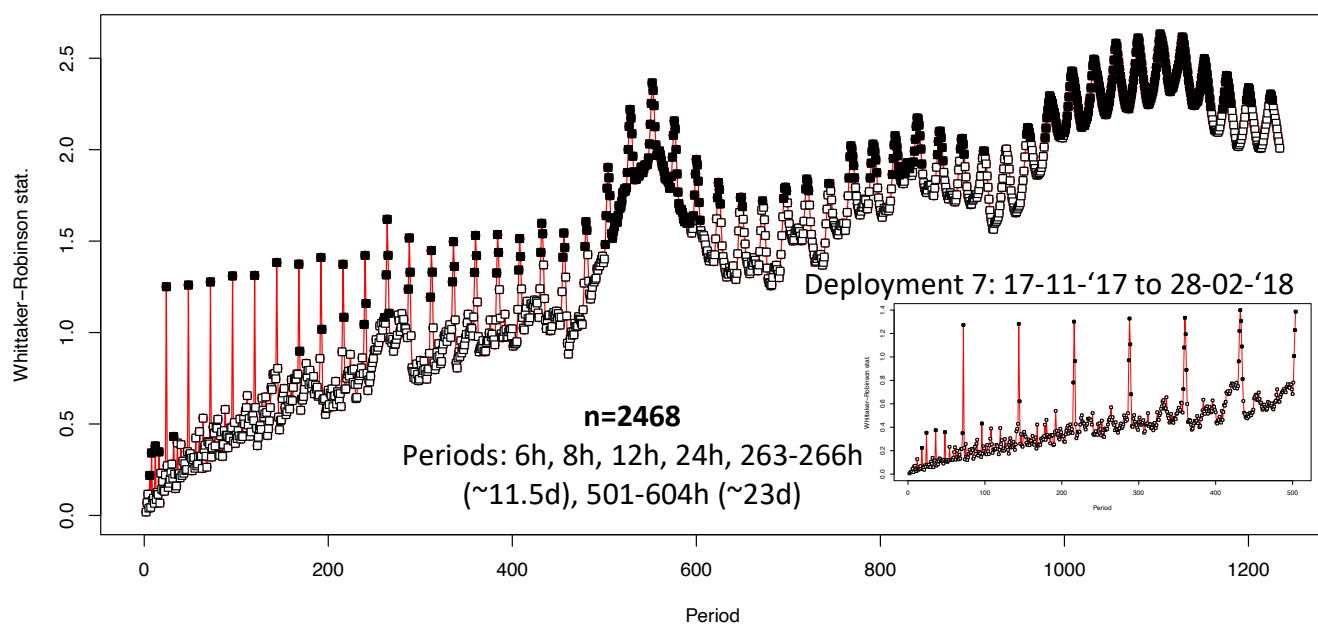

**Figure S5** Whittaker-Robinson periodograms for recorded broadband (30 Hz - 24 kHz) Sound Pressure Levels during deployments at site AB1. “n” indicates the number of hourly samples used to calculate the full periodogram. However, for each site, a maximum of 1500 periods are shown (i.e., 3000 h). Black squares indicate significant (i.e.,  $p < 0.05$ ) periods and harmonics. Deployments where the recording duty cycle increased to 5 min every 20 min have inserts with periodograms based on this higher sampling duty. Insert periodograms cover 504 periods (i.e., 7 days).

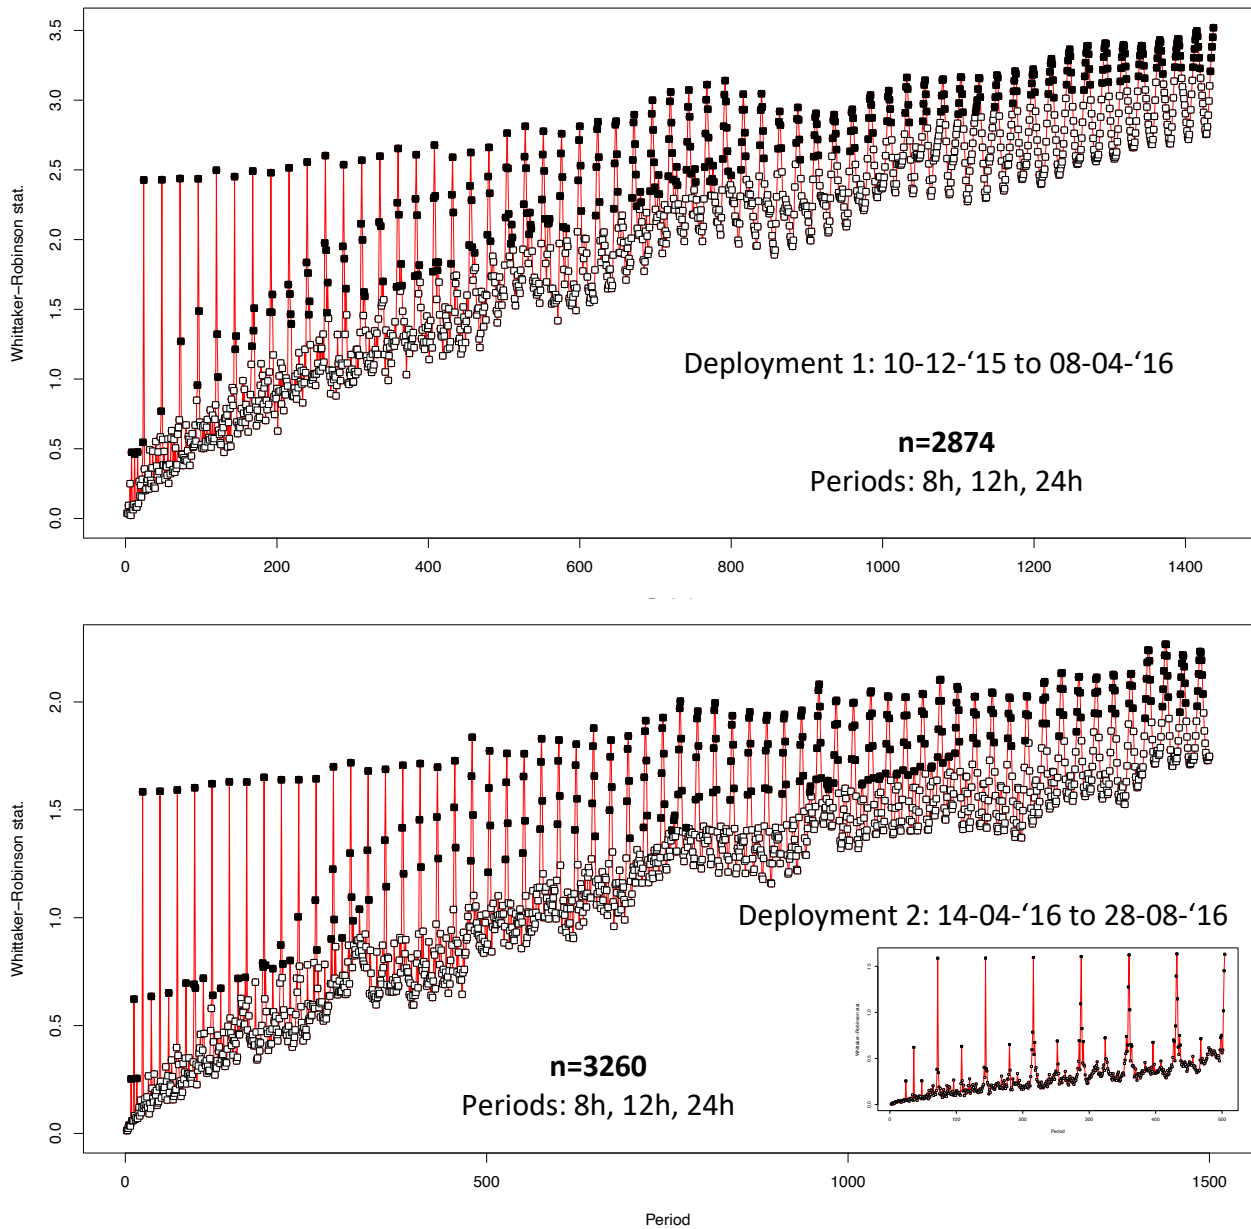



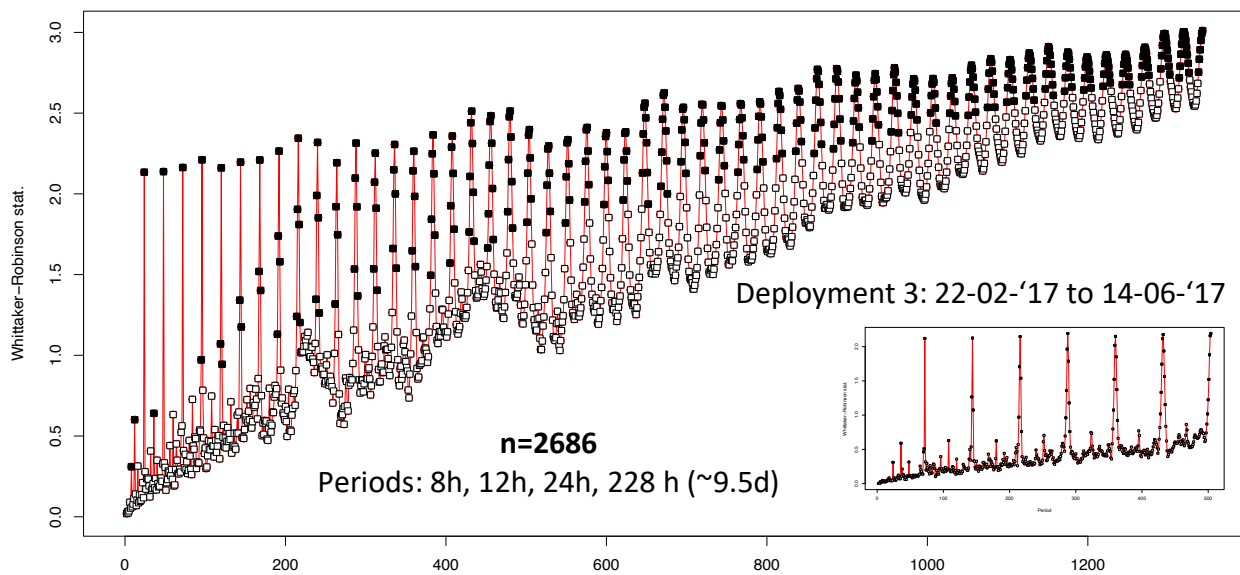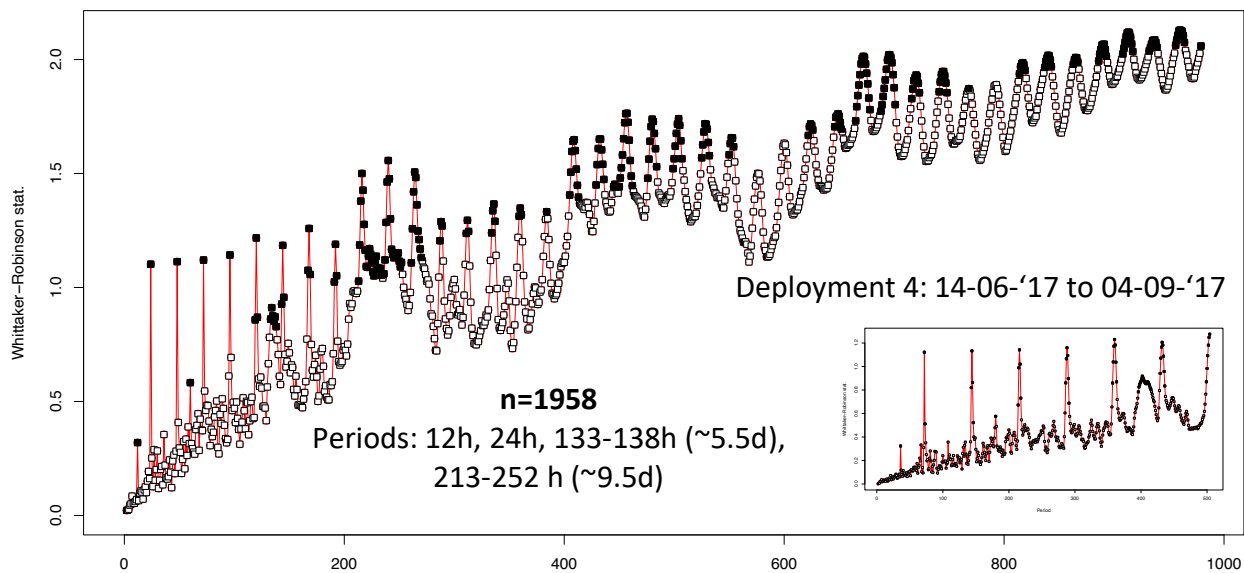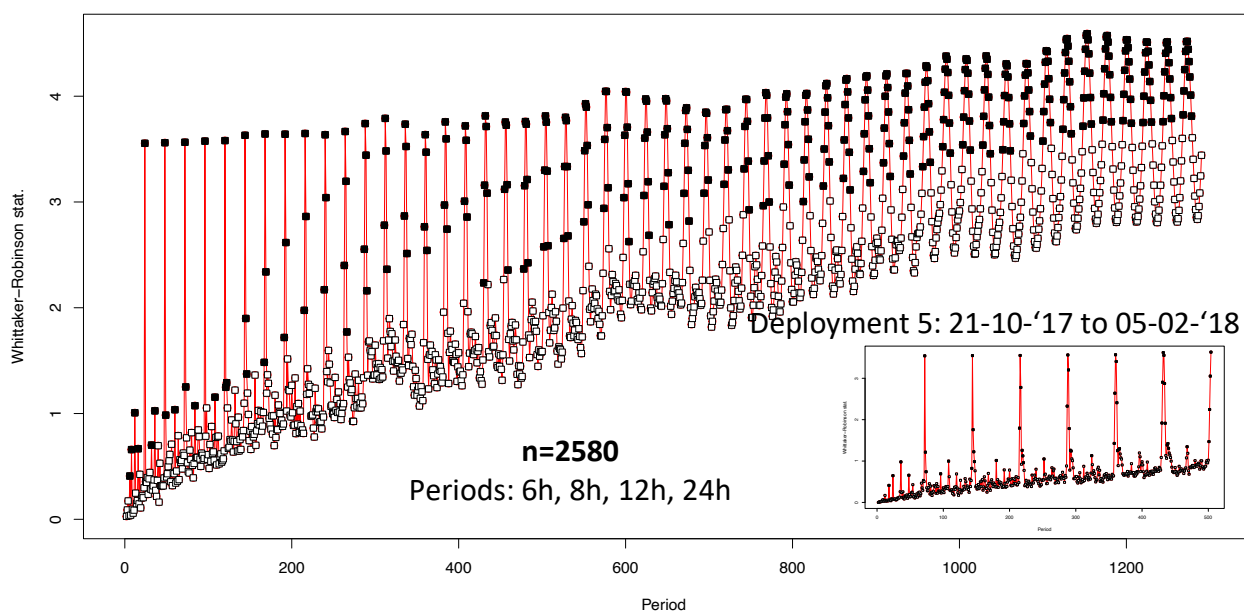

**Figure S6** Whittaker-Robinson periodograms for recorded broadband (30 Hz - 24 kHz) Sound Pressure Levels during deployments at site AB2a. “n” indicates the number of hourly samples used to calculate the full periodogram. However, for each site, a maximum of 1500 periods are shown (i.e., 3000 h). Black squares indicate significant (i.e.,  $p < 0.05$ ) periods and harmonics. Deployments where the recording duty cycle increased to 5 min every 20 min have inserts with periodograms based on this higher sampling duty. Insert periodograms cover 504 periods (i.e., 7 days).

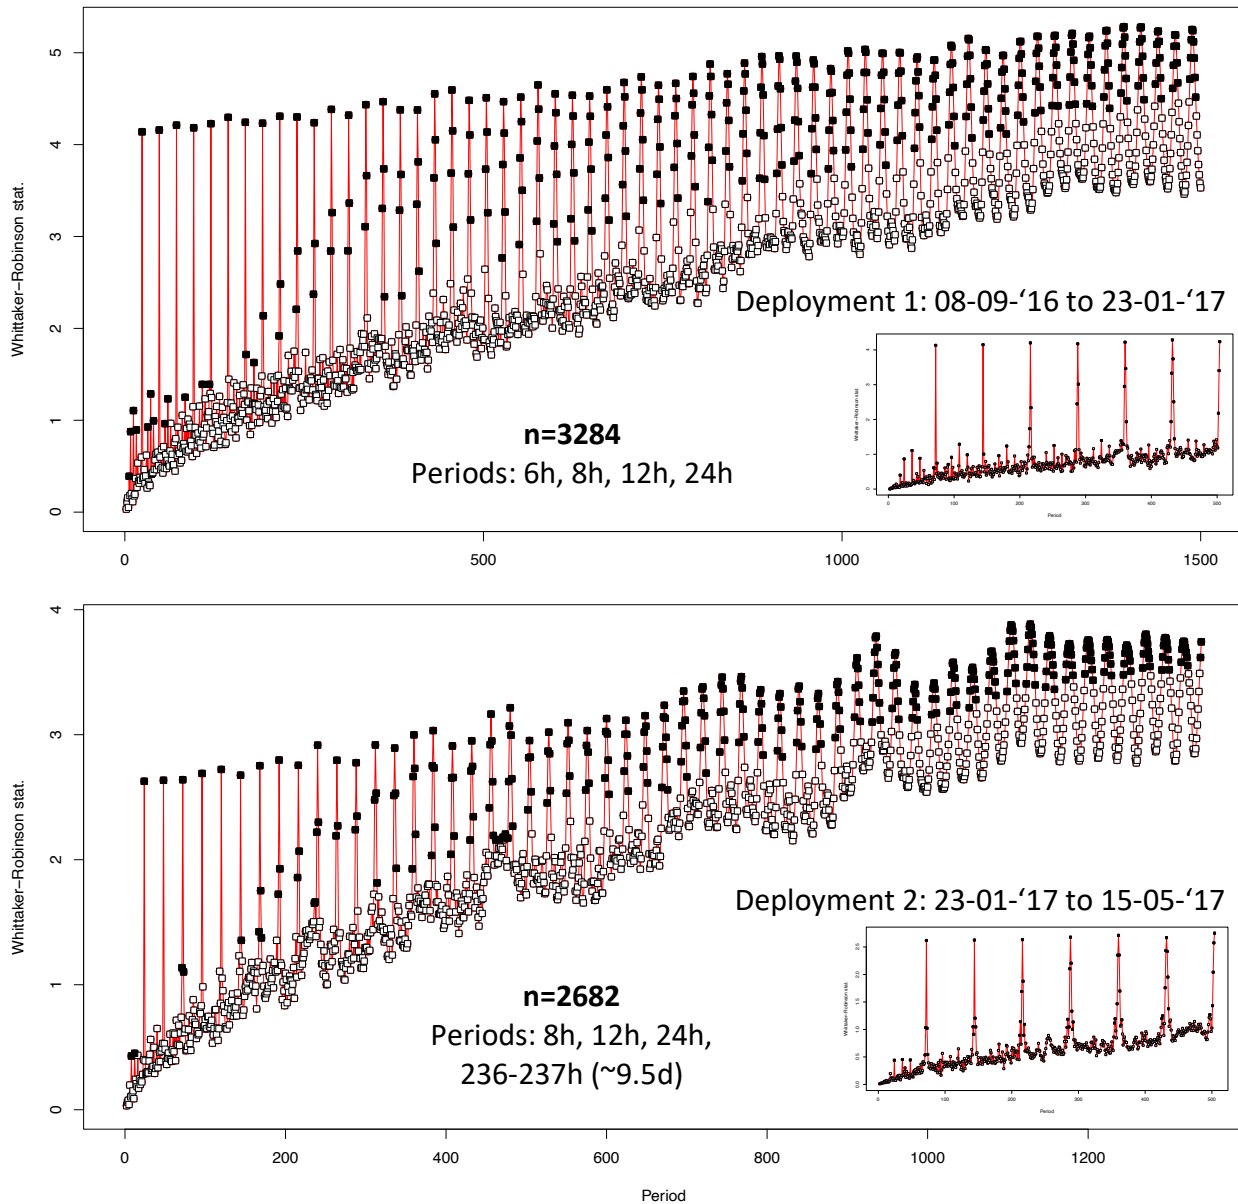

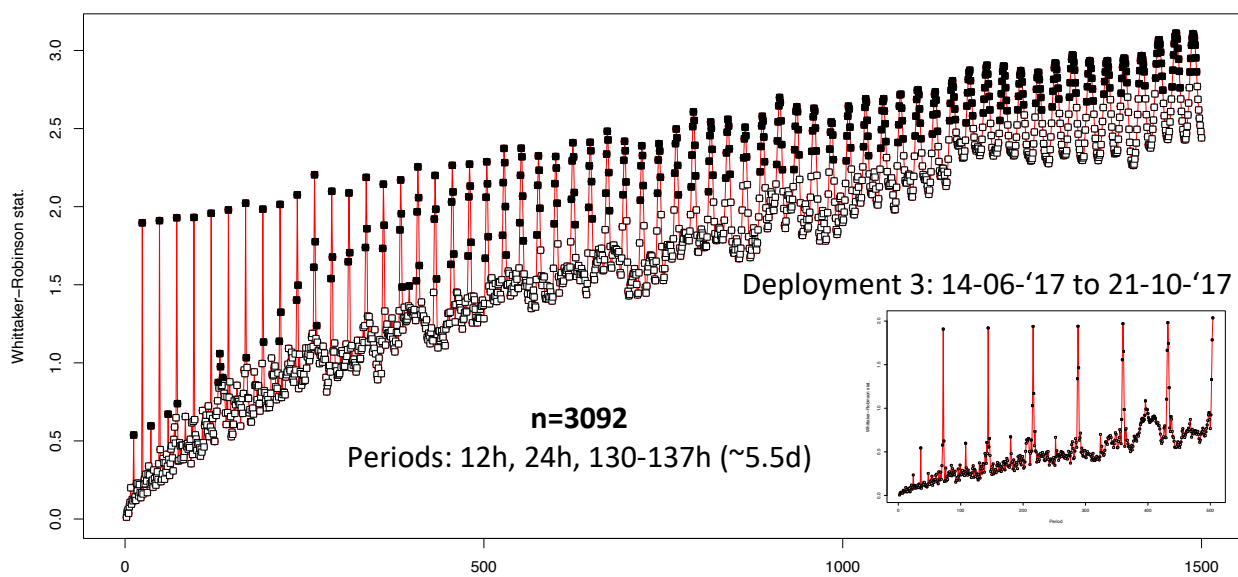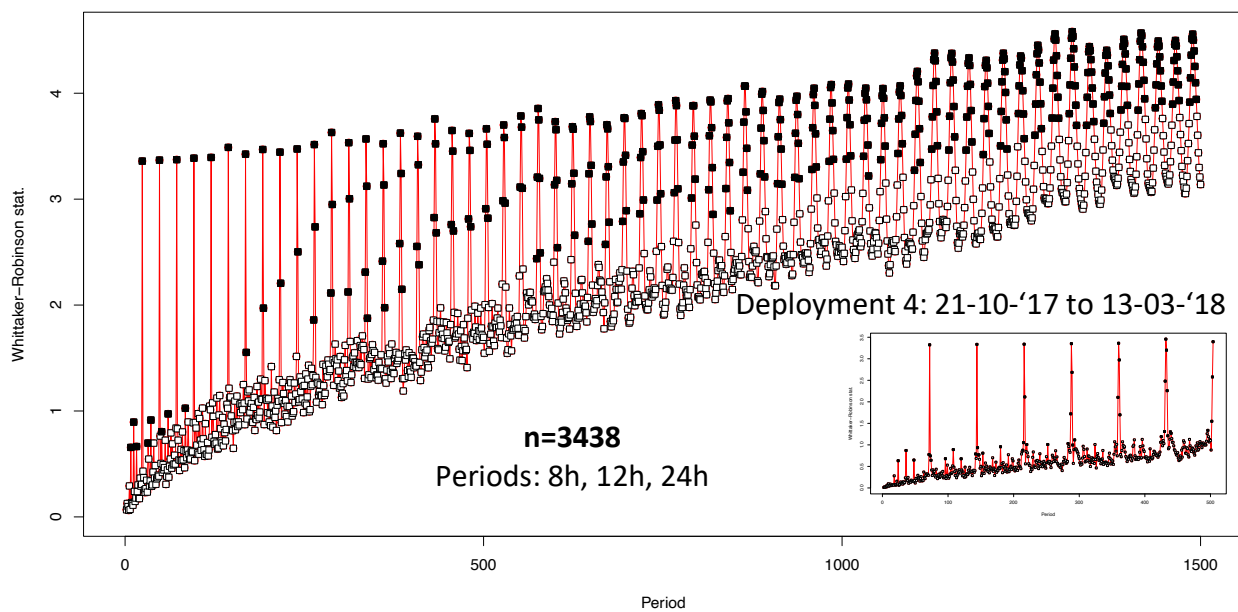



**Figure S7** Whittaker-Robinson periodograms for hourly recorded broadband (30 Hz - 24 kHz) Sound Pressure Levels during deployments at site AB2b. “n” indicates the number of hourly samples used to calculate the full periodogram. However, for each site, a maximum of 1500 periods are shown (i.e., 3000 h). Black squares indicate significant (i.e.,  $p < 0.05$ ) periods and harmonics.

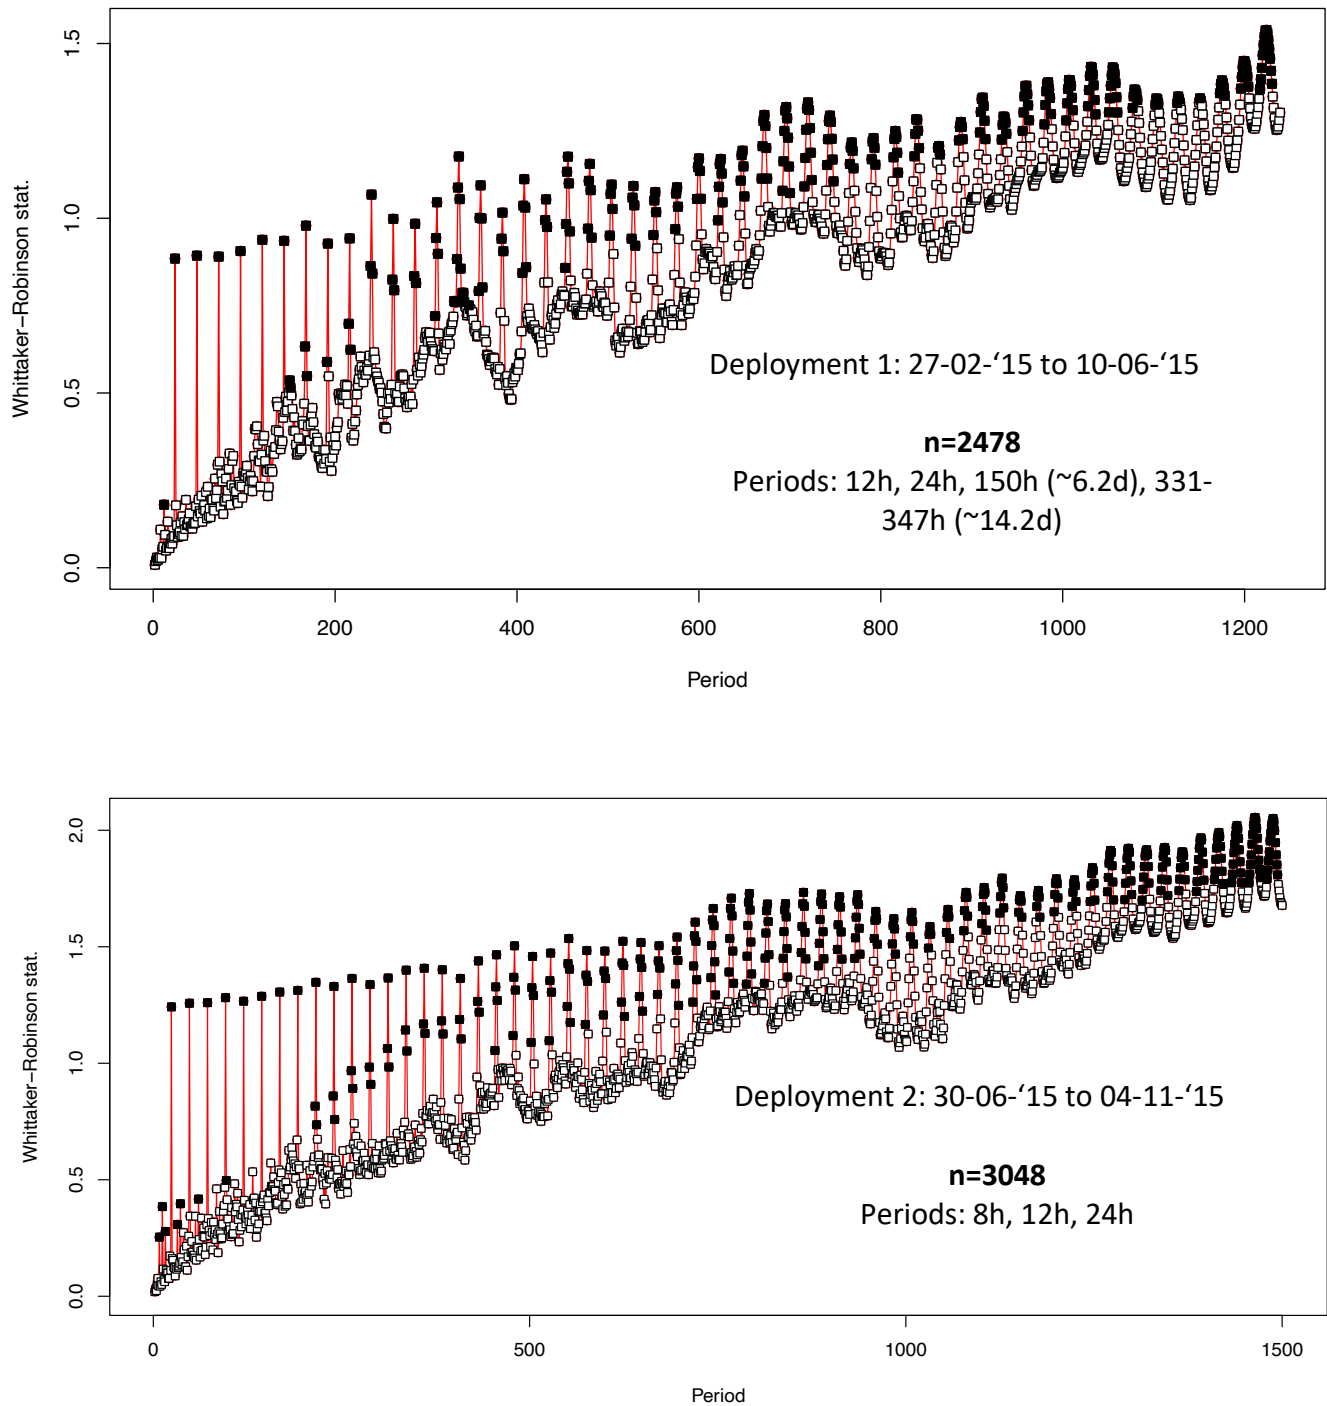

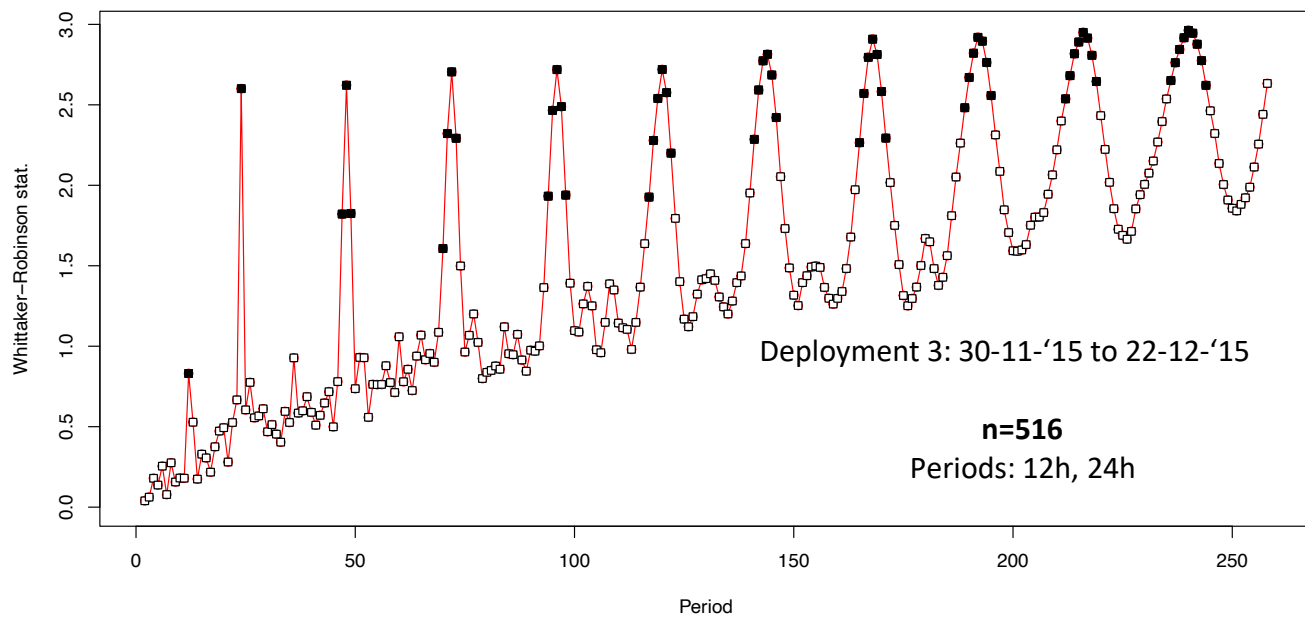

**Figure S8** Regression trees for site SF, AB1, AB2a, and AB2b. Regression trees are based on data from all deployments at one site. Regression trees consist of a root node (i.e., the top box pointed out with a red arrow), internal nodes (i.e., boxes between the root node and leaf nodes), and leaf nodes (i.e., terminal rounded boxes characterised by a predicted broadband Sound Pressure Level and sample size). At each split, the data is divided into smaller data sets based on a predictor variable (named inside the box) that produces maximum homogeneity within the split groups. Predictor variable values that characterise each split are depicted on the split branches.

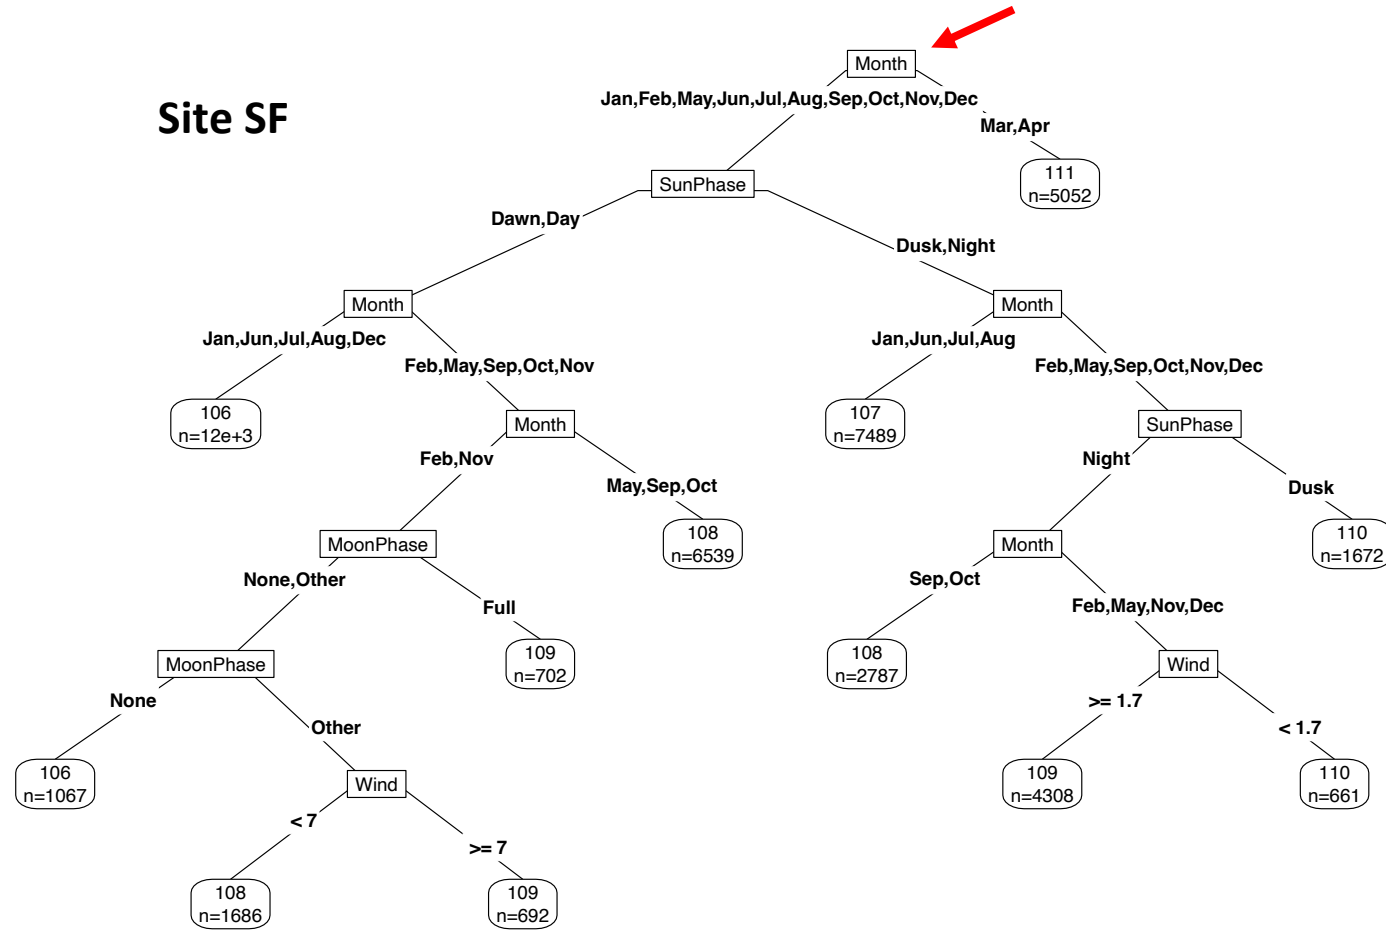



**Site AB1**

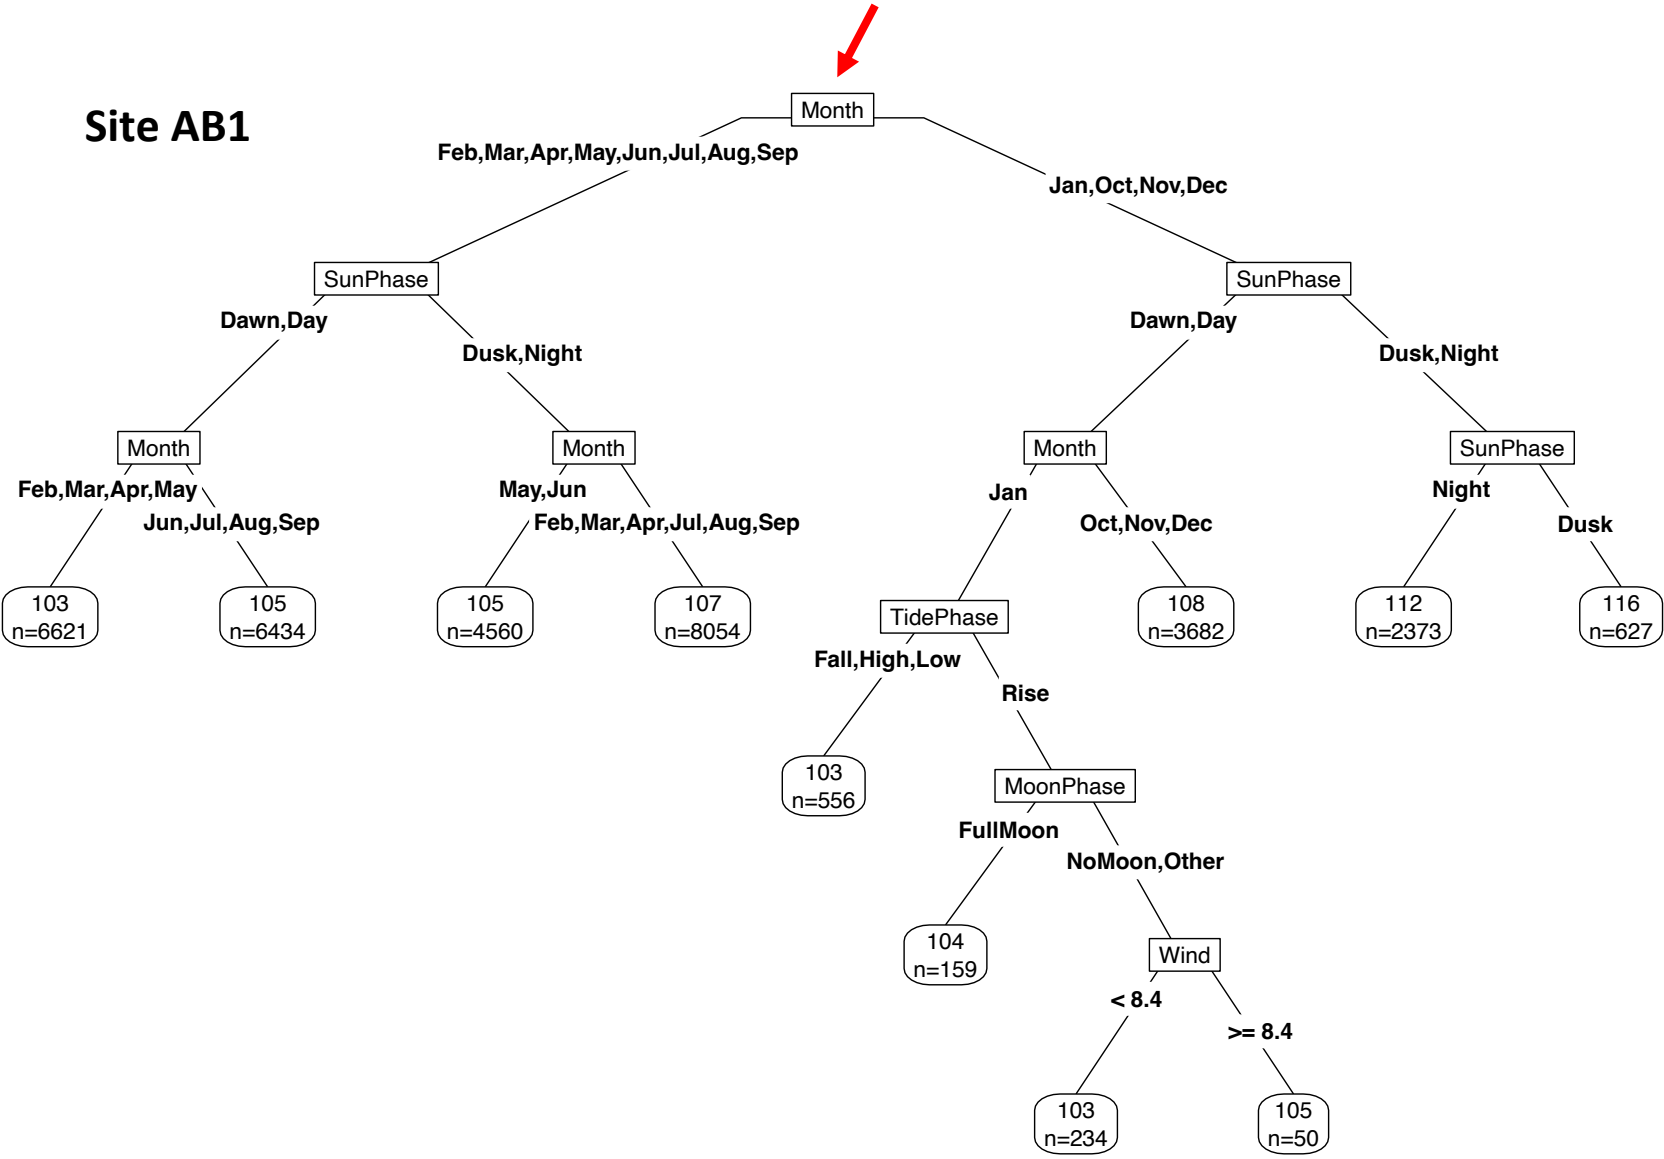

Site AB2a

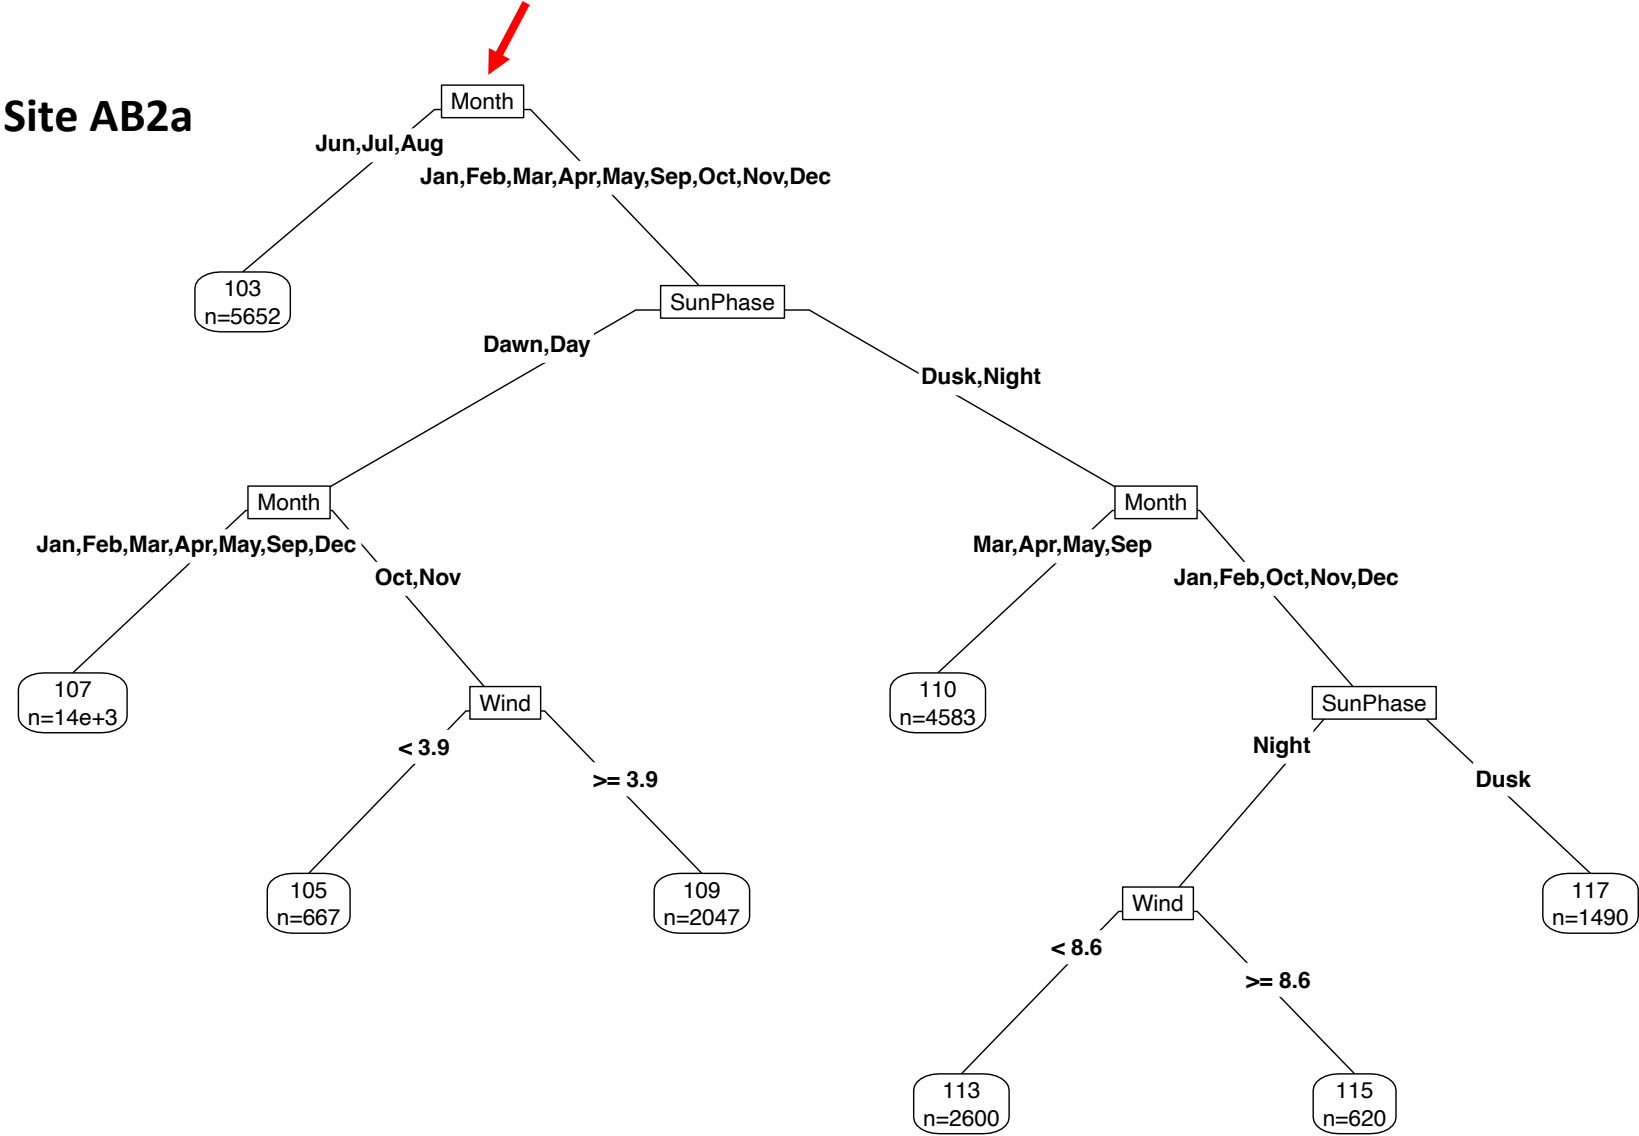

## Site AB2b

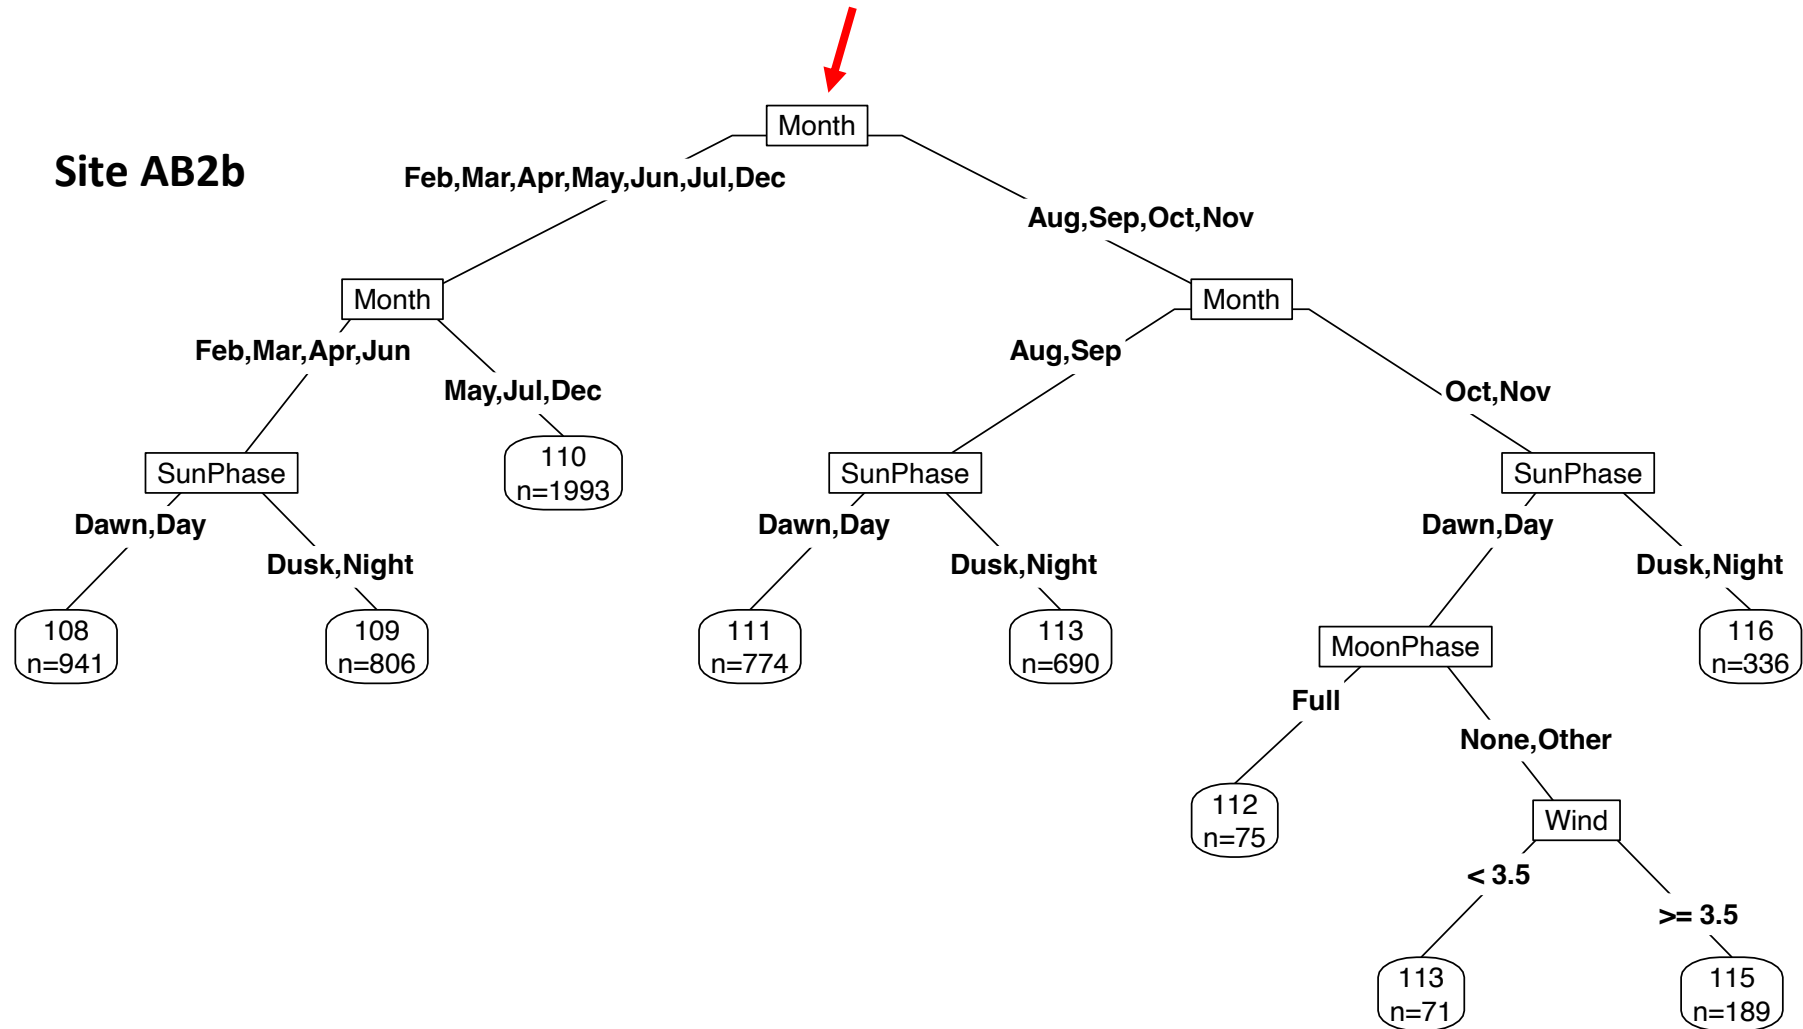



**Figure S9** Maps of average received vessel noise (i.e., SPL) in St. Francis Bay and Algoa Bay by vessel class. Note that colour bars differ in range between vessel classes.

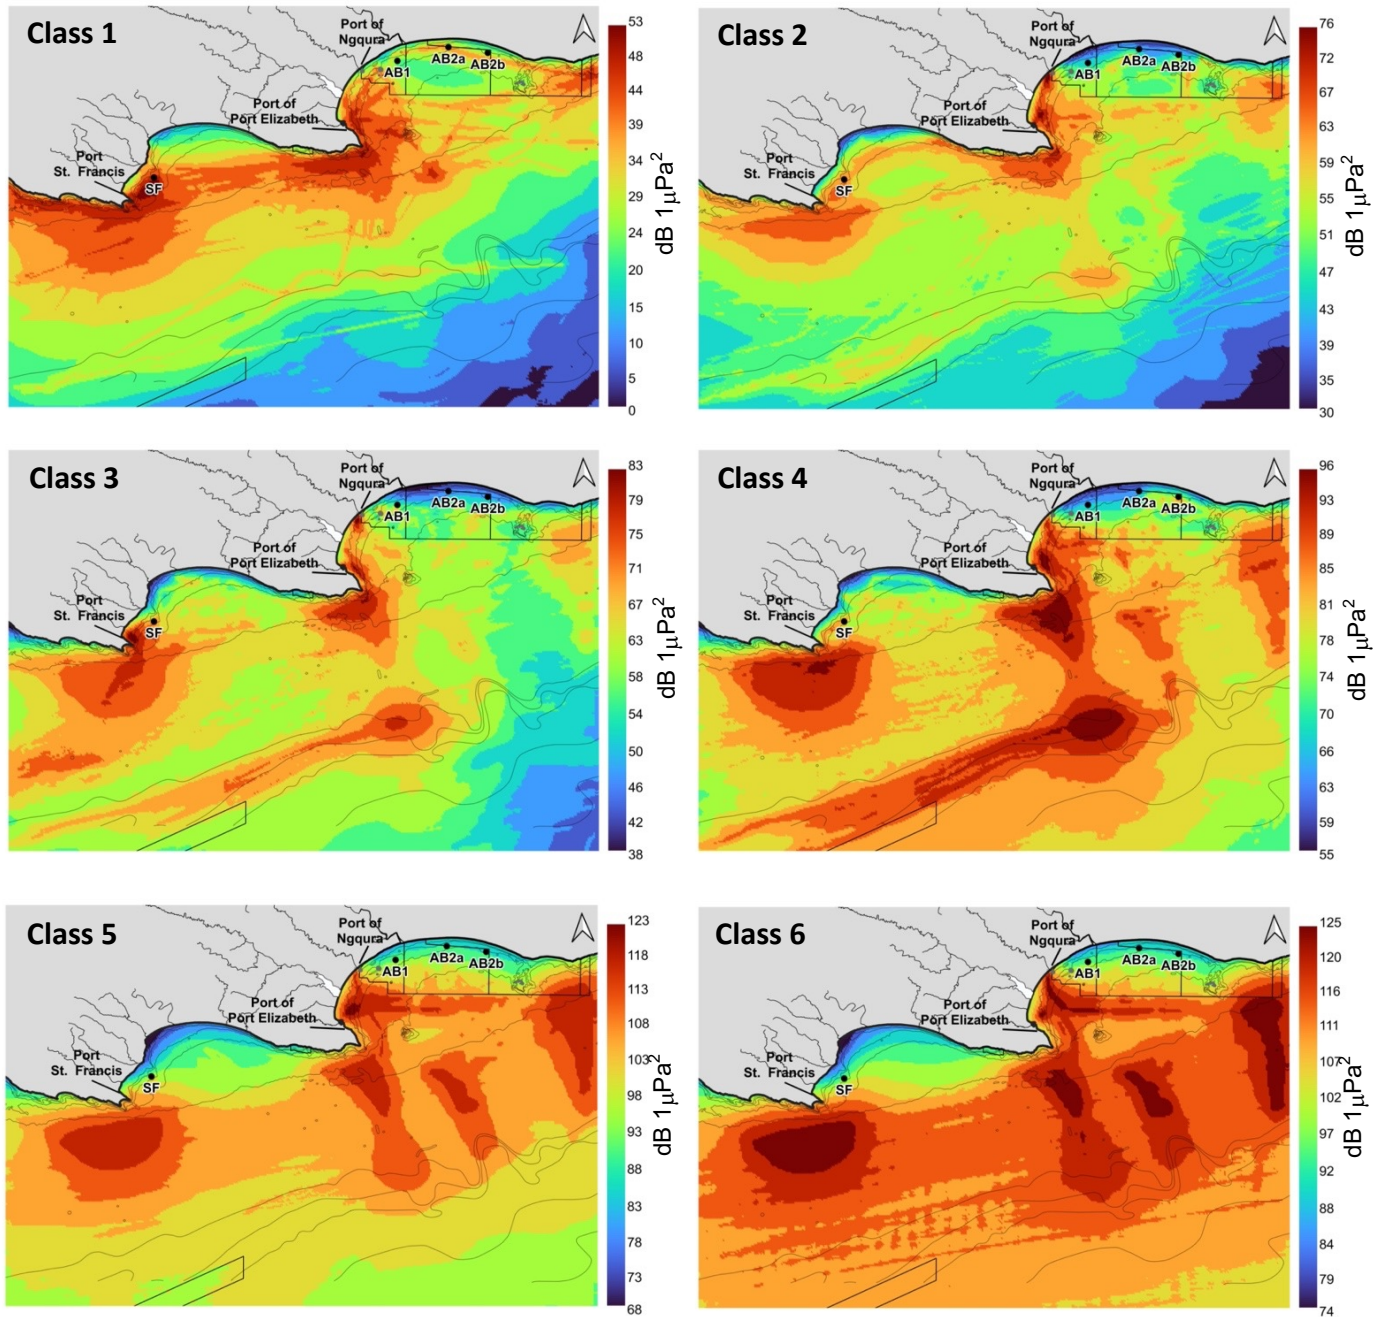

Supplement: s1 [file s1]
